# Supplementary material for: O-GlcNAcylation of SIX1 enhances its stability and promotes Hepatocellular Carcinoma Proliferation
Source: PubMed Central journal article supplement (PMC7449927; doi:10.7150/thno.45161), 2020-08-02
Supplement: thnov10p9830s1.pdf [file thnov10p9830s1.pdf]

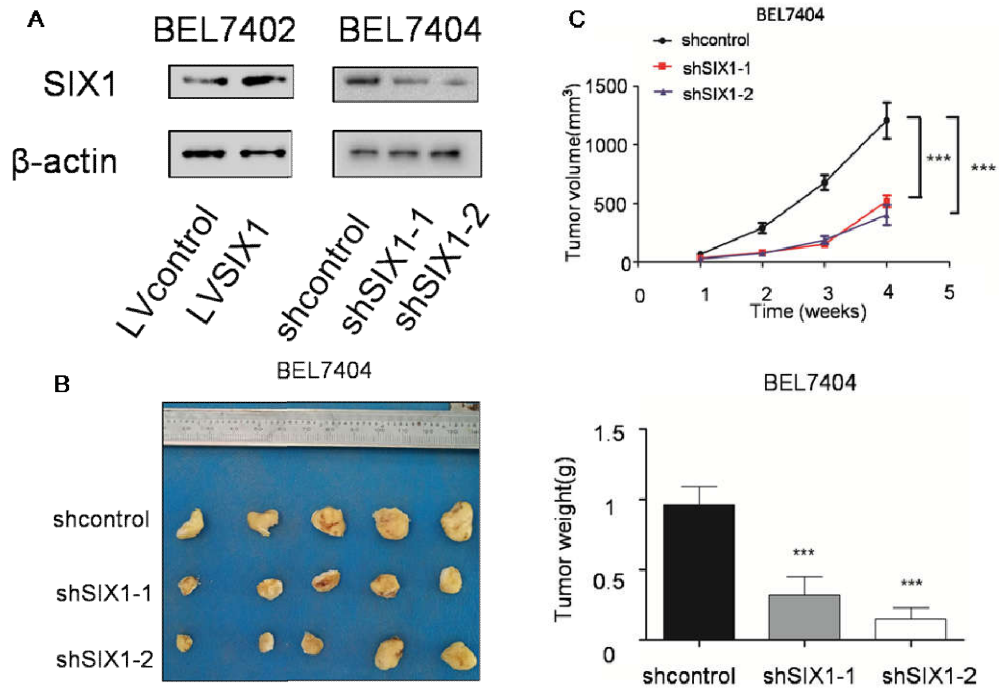

Supplementary Figure S1

A The efficiency of SIX1 manipulation using lentivirus was confirmed by western blot. B Tumors weights of nude mice were measured after four weeks at the experimental endpoint. C Plot of tumor volumes in nude mice measured every week (The data from B were analyzed by one-way ANOVA, and data from C were analyzed by two-way ANOVA. \* $p < 0.05$ , \*\* $p < 0.01$ , \*\*\* $p < 0.001$ ).

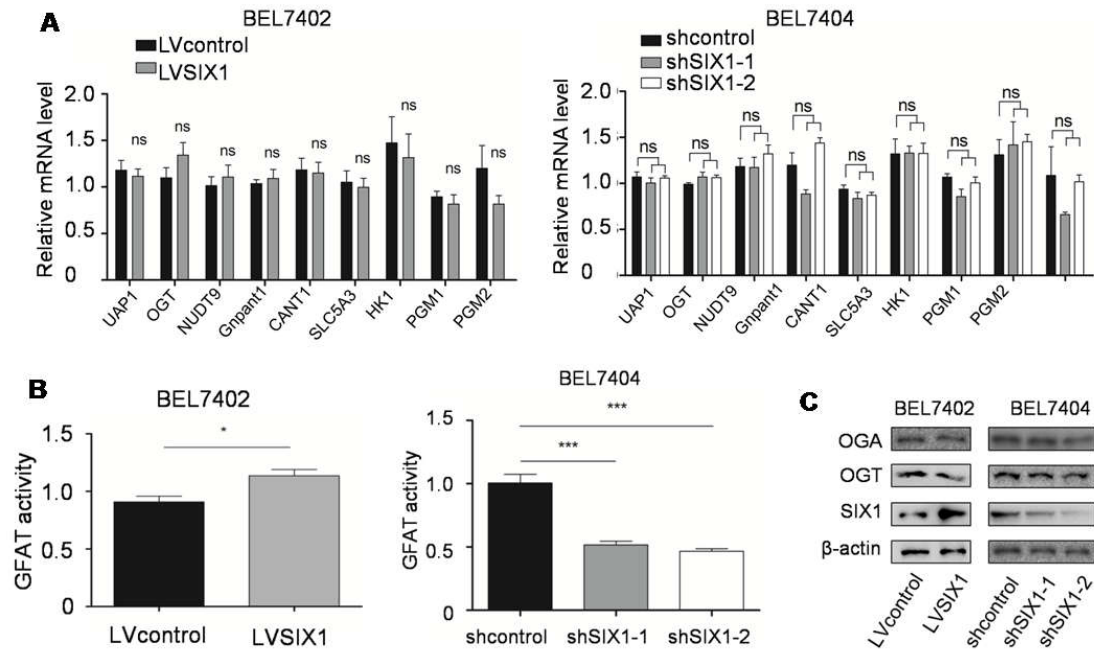

Supplementary Figure S2

A The mRNA levels of HBP related genes (UAP1, OGT, NUDT9, Gnpant1, CANT1, SLC5A3, HK1, PGM1, PGM2) were analyzed with qPCR in cells with SIX1 overexpression or knockdown. B GFAT activities were measured using GDH method in cells with SIX1 overexpression or knockdown. C OGT and OGA protein levels were analyzed by western blot in cells with SIX1 overexpression or knockdown. (The data were analyzed by Student's t-test (BEL7402) and one-way ANOVA (BEL7404). \* $p < 0.05$ , \*\* $p < 0.01$ , \*\*\* $p < 0.001$ ).

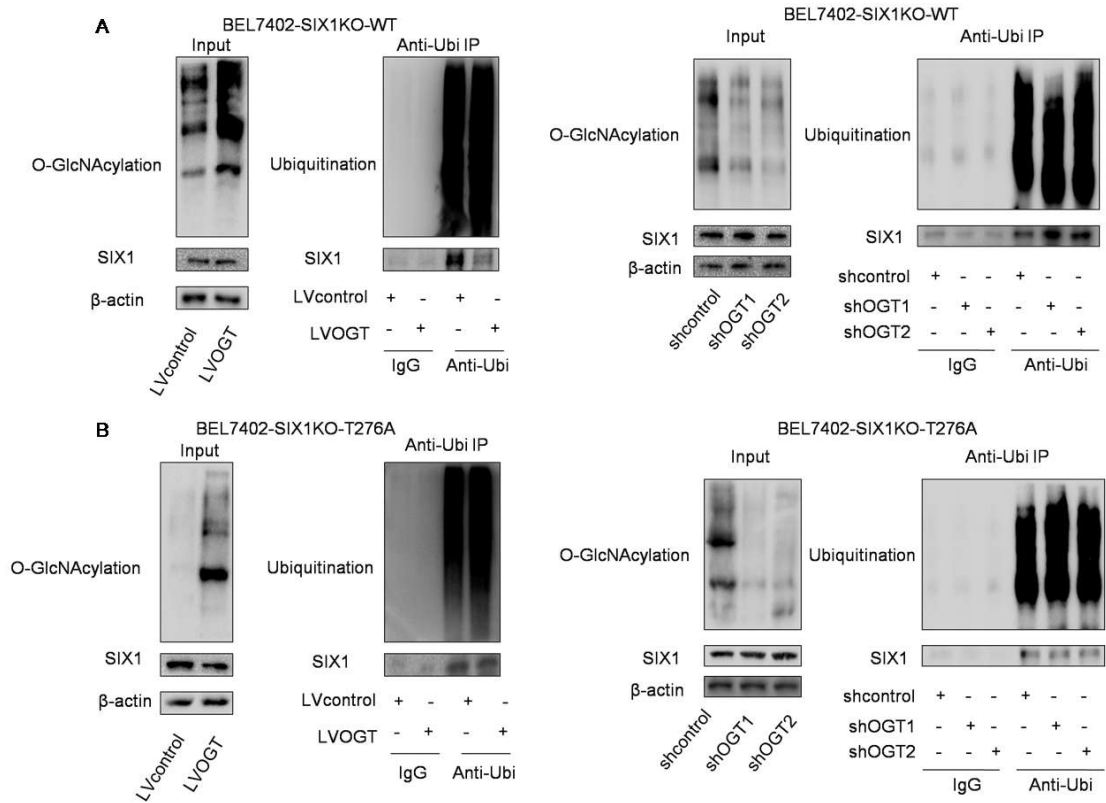

Supplementary Figure S3

The ubiquitination level of WT and T276A SIX1 protein in OGT overexpression and knockdown groups. BEL7402-SIX1KO cells were transfected with WT or mutant SIX1 plasmids and transduced with OGT overexpression or knockdown lentivirus.

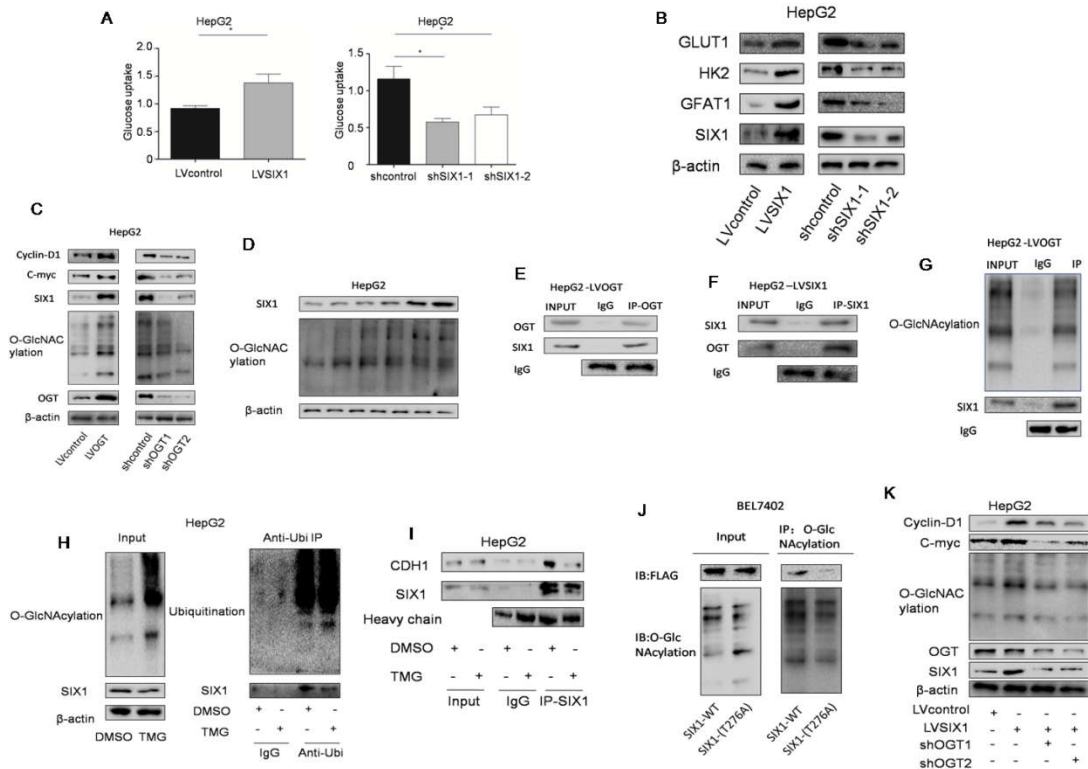

Supplementary Figure S4 The relationship between SIX1 and O-GlcNAcylation were confirmed using HepG2 cells. HepG2 cells were transduced with relevant SIX1 or OGT lentivirus.

A Glucose uptake levels were determined in HepG2 with different SIX1 expressions. B GLUT1, HK2, and GFAT1 expressions were confirmed using western blot. C SIX1 and its direct target genes were analyzed in HepG2 cells with different OGT expressions. D SIX1 expression in HepG2 cells treated with an OGA inhibitor (TMG) at the indicated times. E Immunoprecipitation with anti-OGT antibody followed by western blotting with anti-SIX1 antibody. F Immunoprecipitation with anti-SIX1 antibody followed by western blotting with anti-OGT antibody. G O-GlcNAcylation modified protein immunoprecipitated from cell extracts were analyzed by immunoblotting for anti-SIX1. H Ubiquitination of SIX1 was examined in HepG2 cells after OGA inhibitor treatment. MG132 and NEM were used to inhibit proteasome and deubiquitination, respectively. I CDH1 was detected in purified SIX1 Immunoprecipitation samples in HepG2 cells treated with DMSO or TMG. J The O-GlcNAcylation of Thr276 in SIX1 was analyzed by western blot in HepG2 cells. K SIX1 downstream factor protein levels and quantitative analysis in HepG2 treated as indicated were examined by western blot. (The data were analyzed by Student's t-test (BEL7402) and one-way ANOVA (BEL7404). \* $p < 0.05$ , \*\* $p < 0.01$ , \*\*\* $p < 0.001$ ).

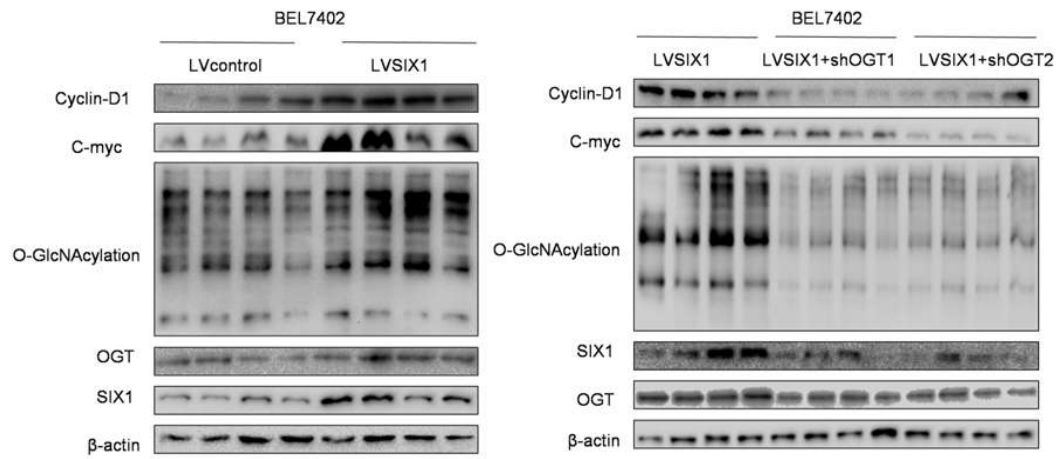

Supplementary Figure S5

Western blotting of the indicated factors in the tumors from the nude mice.

Supplementary Table 1

**Primers for qPCR**

| Name           | 5'-3'                      |
|----------------|----------------------------|
| Glut1-qPCR-F   | AAGAAGCTGACGGGTGCGCCTCATGC |
| Glut1-qPCR-R   | TGAGAGGGACCAGAGCGTGGTG     |
| Nudt9-qPCR-F   | GAAAAGTTGCACAACTCTTCAG     |
| Nudt9-qPCR-R   | TCATTGATGTCCACCCATTTAC     |
| Gucy1a3-qPCR-F | GAAGCACAGCCCCGAGGTGTG      |
| Gucy1a3-qPCR-R | ACTGACAAACAGAAGCCACTATC    |
| Cant1-qPCR-F   | GGCACCGTGGAGAAAGGCTTC      |
| Cant1-qPCR-R   | GACACCCAGTTCTCGTGGTCCAC    |
| Gfpt1-qPCR-F   | CTGATCACATTCTATACTCTACAG   |
| Gfpt1-qPCR-R   | GTTCTATGACAGCACTTGCATC     |
| Gnpant1-qPCR-F | CAGATTGTTGCTACGGCAACTC     |
| Gnpant1-qPCR-R | GACATTCAAGGGTAATCTTGTAAC   |
| Uap1-qPCR-F    | GCAGTTCTTCTTCTAGCTGGTG     |
| Uap1-qPCR-R    | ATTCCATTGTTCTGCCACTGGTC    |
| OGT-qPCR-F     | GGCAGTACAAGCTTACGTCTCTG    |
| OGT-qPCR-R     | GTGCATTGAAAACACAGCCAAG     |
| SLC5A3-qPCR-F  | CATCAGGGATCTATACTCTTCAG    |
| SLC5A3-qPCR-R  | ACTAGGGACAGCCACTGGTATACAC  |
| GAPDH-qPCR-F   | ATCATCCCTGCCTCTACTGG       |
| GAPDH-qPCR-R   | GTCAGGTCCACCACTGACAC       |
| Hk1-qPCR-F     | AGTGGAAGGAGCAGATGTGGTC     |
| Hk1-qPCR-R     | TGTAGCAAGCATTGGTGCCAGTG    |
| Hk2-qPCR-F     | CTAAACTAGACGAGAGTTTCCTG    |
| Hk2-qPCR-R     | CTCACAGTTGTGGTCATCATAAC    |
| SIX1-qPCR-F    | CGCGCACAATCCCTACCCATCGCC   |
| SIX1-qPCR-R    | CTTCCAGAGGAGAGAGTTGGTTCTG  |
| Tubulin-qPCR-F | CCAAGCTGGAGTTCTCTA         |
| Tubulin-qPCR-R | CAATCAGAGTGCTCCAGG         |
| Pgm1-qPCR-F    | CCAAATCAGCAAGACAATTGAAG    |
| Pgm1-qPCR-R    | GTCGGTTTGGCCCAGAAAGTAGTTC  |
| Pgm2-qPCR-F    | CCTCTTTTCTGATATAACGCCAAC   |
| Pgm2-qPCR-R    | CCCTTTATCGTGAGGAGAAATG     |

Supplementary Table S2

**1. Vector information :**

Vector: GV141

Component order: CMV-MCS-3FLAG-SV40-Neomycin

Clone Site : XhoI / KpnI

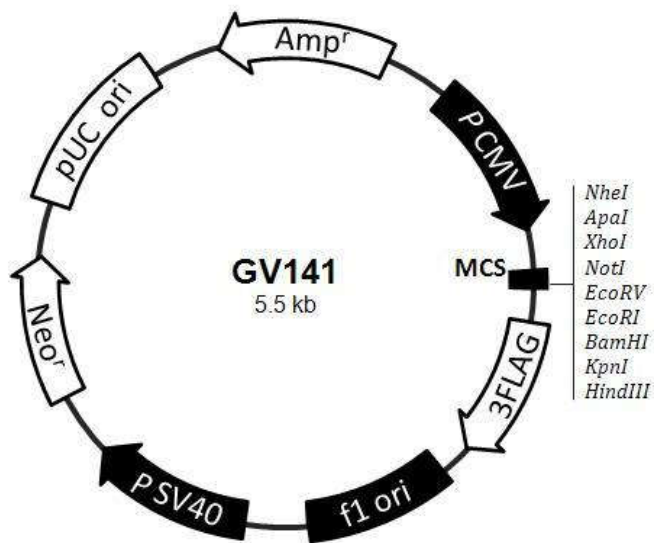

## 2. Primer in acquisition of target gene fragments and sequencing results

### ①SIX1 (wild type)

| ID                  | sequence                                           |
|---------------------|----------------------------------------------------|
| SIX1 (wild type)-P1 | ACGGGCCCTCTAGACTCGAGCGCCACCATGTCGATGCTGCCGTCGTTGGC |
| SIX1 (wild type)-P2 | AGTCACTTAAGCTTGGTACCGAGGACCCCAAGTCCACCAGACTGG      |

TGCTTACTGGCTTATCGAAATTAATACGACTCACTATAGGGAGACCCAAGCTGGCTAGC  
 GTTTAAACGGGCCCTCTAGACTCGAGCGCCACCATGTCGATGCTGCCGTCGTTGGCTT  
 TACGCAGGAGCAAGTGGCGTGCGTGTGCGAGGTTCTGCAGCAAGGCGGAAACCTGGA  
 GCGCCTGGGCAGGTTCCCTGTGGTCACTGCCCGCCTGCGACCACCTGCACAAGAACGA  
 GAGCGTACTCAAGGCCAAGGCGGTGGTTCGCCTTCCACCGCGGCAACTTCCGTGAGCT  
 CTACAAGATCCTGGAGAGCCACCAGTTCTCGCCTCACAACCACCCCAAACCTGCAGCAA  
 CTGTGGCTGAAGGCGCATTACGTGGAGGCCGAGAAGCTGCGCGGCCGACCCCTGGGC  
 GCCGTGGGCAAATATCGGGTGCGCCGAAAATTTCCACTGCCGCGCACCATCTGGGACG  
 GCGAGGAGACCAGCTACTGCTTCAAGGAGAAGTCGAGGGGTGCCTGCGGGAGTGGT  
 ACGCGCACAATCCCTACCCATCGCCGCGTGAGAAGCGGGAGCTGGCCGAGGCCACCG  
 GCCTCACCACCACCCAGGTCAGCAACTGGTTTAAGAACCGGAGGCAAAGAGACCGGG  
 CCGCGGAGGCCAAGGAAAGGGAGAACACCGAAAACAATAACTCCTCCTCCAACAAGC  
 AGAACCAACTCTCTCCTCTGGAAGGGGGCAAGCCGCTCATGTCCAGCTCAGAAGAGG  
 AATTCTCACCTCCCCAAAGTCCAGACCAGAACTCGGTCCTTCTGCTGCAGGGCAATAT  
 GGGCCACGCCAGGAGCTCAAACCTATTCTCTCCCGGGCTTAACAGCCTCGCAGCCCAGT  
 CACGGCCTGCAGACCCACCAGCATCAGCTCCAAGACTCTCTGCTCGGCCCCCTCACCT  
 CCAGTCTGGTGGACTTGGGGTCCCTCGGTACCAAGCTTAAGTGACTIONACAAGGATGACGA  
 TGACAAGGATTACAAAGACGACGATGATAAGGACTATAAGGATGATGACGACAAATCT  
 AGATAGTTAAACCGCTGATCAGCCTCG

### ②SIX1 (S225A)

| ID             | sequence                                          |
|----------------|---------------------------------------------------|
| SIX1(S225A)-p1 | ACGGGCCCTCTAGACTCGAGCGCCACCATGTCGATGCTGCCGTCGTTGG |
| SIX1(S225A)-p2 | AGTCACTTAAGCTTGGTACCGAGGACCCCAAGTCCACCAGACTGG     |



|                |                                      |
|----------------|--------------------------------------|
| SIX1(S225A)-p3 | CACCTCCCCAAGCTCCAGACCAGAACTCGGTCTTC  |
| SIX1(S225A)-p4 | CTGGTCTGGAGCTTGGGGAGGTGAGAATTCCTCTTC |

ACTGGCTTATCGAAATTAATACGACTCACTATAGGGAGACCCAAGCTGGCTAGCGTTTA  
AACGGGCCCTCTAGACTCGAGCGCCACCATGTCGATGCTGCCGTCGTTTGGCTTTACG  
CAGGAGCAAGTGGCGTGCCTGTGCGAGGTTCTGCAGCAAGGCGGAAACCTGGAGCG  
CCTGGGCAGGTTCTGTGGTCACTGCCCCCTGCGACCACCTGCACAAGAACGAGAG  
CGTACTCAAGGCCAAGGCGGTGGTCGCCTTCCACCGCGGCAACTTCCGTGAGCTCTAC  
AAGATCCTGGAGAGCCACCAGTTCTCGCCTCACAACCACCCCAAACCTGCAGCAACTG  
TGGCTGAAGGCGCATTACGTGGAGGCCGAGAAGCTGCGCGGCCGACCCCTGGGCGCC  
GTGGGCAAATATCGGGTGCGCCGAAAATTTCCACTGCCGCGCACCATCTGGGACGGCG  
AGGAGACCAGCTACTGCTTCAAGGAGAAGTCGAGGGGTGTCCTGCGGGAGTGGTACG  
CGACAATCCCTACCCATCGCCGCGTGAGAAGCGGGAGCTGGCCGAGGCCACCGGCC  
TCACCACCACCCAGGTCAGCAACTGGTTTAAGAACCGGAGGCAAAGAGACCGGGCCG  
CGGAGGCCAAGGAAAGGGAGAACACCGAAAACAATAACTCCTCCTCCAACAAGCAG  
AACCAACTCTCCTCTGGAAGGGGGCAAGCCGCTCATGTCCAGCTCAGAAGAGGAA  
TTCTCACCTCCCCAAGCTCCAGACCAGAACTCGGTCTTCTGCTGCAGGGCAATATGG  
GCCACGCCAGGAGCTCAAATATTCTCTCCCGGGCTTAACAGCCTCGCAGCCCAGTCA  
CGGCCTGCAGACCCACCAGCATCAGCTCCAAGACTCTCTGCTCGGCCCCCTCACCTCC  
AGTCTGGTGGACTTGGGGTCTCGGTACCAAGCTTAAGTACTACAAGGATGACGATG  
ACAAGGATTACAAAGACGACGATGATAAGGACTATAAGGATGATGACGACAAATCTAG  
ATAGTTAAACCGCTGATCAGCCTCGACTGTGCCTTCTA

③SIX1 (T252A)

| ID              | sequence                                          |
|-----------------|---------------------------------------------------|
| SIX1 (T252A)-p1 | ACGGGCCCTCTAGACTCGAGCGCCACCATGTCGATGCTGCCGTCGTTTG |
| SIX1 (T252A)-p2 | GCGAGGCTGCTAAGCCCGGGAGAGAATAGTTTG                 |
| SIX1 (T252A)-p3 | CCCGGGCTTAGCAGCCTCGCAGCCCAGTCAC                   |
| SIX1 (T252A)-p4 | AGTCACTTAAGCTTGGTACCGAGACCCCAAGTCCACCAGACTGG      |

AGCTCTCTGGCTAACTAGAGAACCCACTGCTTACTGGCTTATCGAAATTAATACGACTC

ACTATAGGGAGACCCAAGCTGGCTAGCGTTTAAACGGGCCCTCTAGACTCGAGCGCCA  
 CCATGTCGATGCTGCCGTCGTTTGGCTTTACGCAGGAGCAAGTGGCGTGCGTGTGCGA  
 GGTCTGCAGCAAGGCGGAAACCTGGAGCGCCTGGGCAGGTTCTGTGGTCACTGCC  
 CGCCTGCGACCACCTGCACAAGAACGAGAGCGTACTCAAGGCCAAGGCGGTGGTTCG  
 CTCCACCGCGGCAACTTCCGTGAGCTCTACAAGATCCTGGAGAGCCACCAGTTCTCG  
 CCTCACAACCACCCCAAACCTGCAGCAACTGTGGCTGAAGGCGCATTACGTGGAGGCC  
 GAGAAGCTGCGCGGCCGACCCCTGGGCGCCGTGGGCAAATATCGGGTGCGCCGAAAA  
 TTTCCACTGCCGCGCACCATCTGGGACGGCGAGGAGACCAGCTACTGCTTCAAGGAG  
 AAGTCGAGGGGTGTCTGCGGGAGTGGTACGCGCACAATCCCTACCCATCGCCGCGTG  
 AGAAGCGGGAGCTGGCCGAGGCCACCGGCCTCACCACCACCAGGTCAGCAACTGGT  
 TTAAGAACCGGAGGCAAAGAGACCGGGCCGCGGAGGCCAAGGAAAGGGAGAACACC  
 GAAAACAATAACTCCTCCTCCAACAAGCAGAACCAACTCTCTCCTCTGGAAGGGGGC  
 AAGCCGCTCATGTCCAGCTCAGAAGAGGAATTCTCACCTCCCCAAAGTCCAGACCAG  
 AACTCGGTCTTCTGCTGCAGGGCAATATGGGCCACGCCAGGAGCTCAAACCTATTCTC  
 TCCCGGGCTTAGCAGCCTCGCAGCCCAGTCACGGCCTGCAGACCCACCAGCATCAGCT  
 CCAAGACTCTCTGCTCGGCCCCCTCACCTCCAGTCTGGTGGACTTGGGGTCTCTCGGTA  
CCAAGCTTAAGTGACTACAAGGATGACGATGACAAGGATTACAAAGACGACGATGATA  
 AGGACTATAAGGATGATGACGACAAATCTAGATAGTTAAACCGCTGATCAGCCTCGACT  
 GTGCCTT

④SIX1 (T276A)

| ID                 | sequence                                                              |
|--------------------|-----------------------------------------------------------------------|
| SIX1<br>(T276A)-P1 | ACGGGCCCTCTAGACTCGAGCGCCACCATGTCGATGCTGCCGTCGTTT                      |
| SIX1<br>(T276A)-P2 | AGTCACTTAAGCTTGGTACCGAGGACCCCAAGTCCACCAGACTGGAGGCGAGGGGGCCGAGCAGAGATC |

AGAACCCTGCTTACTGGCTTATCGAAATTAATACGACTCACTATAGGGAGACCCAAG  
 CTGGCTAGCGTTTAAACGGGCCCTCTAGACTCGAGCGCCACCATGTCGATGCTGCCG  
 CGTTTGGCTTTACGCAGGAGCAAGTGGCGTGCGTGTGCGAGGTTCTGCAGCAAGGCG

GAAACCTGGAGCGCCTGGGCAGGTTCTGTGGTCACTGCCC GCCTGCGACCACCTGC  
ACAAGAACGAGAGCGTACTCAAGGCCAAGGCGGTGGTCGCCTTCCACCGCGGCAACT  
TCCGTGAGCTCTACAAGATCCTGGAGAGCCACCAGTTCTCGCCTCACAACCACCCCAA  
ACTGCAGCAACTGTGGCTGAAGGCGATTACGTGGAGGCCGAGAAGCTGCGCGGCCG  
ACCCCTGGGCGCCGTGGGCAAATATCGGGTGCGCCGAAAATTTCCACTGCCGCGCACC  
ATCTGGGACGGCGAGGAGACCAGTACTGCTTCAAGGAGAAGTCGAGGGGTGTCCTG  
CGGGAGTGGTACGCGCACAATCCCTACCCATCGCCGCGTGAGAAGCGGGAGCTGGCC  
GAGGCCACCGGCCTCACCACCACCCAGGTCAGCAACTGGTTTAAGAACCGGAGGCAA  
AGAGACCGGGCCGCGGAGGCCAAGGAAAGGAGAACACCGAAAACAATAACTCCTC  
CTCCAACAAGCAGAACCAACTCTCTCCTCTGGAAGGGGGCAAGCCGCTCATGTCCAG  
CTCAGAAGAGGAATTCTCACCTCCCCAAAGTCCAGACCAGA ACTCGGTCCTTCTGCTG  
CAGGGCAATATGGGCCACGCCAGGAGCTCAA ACTATTCTCTCCCGGGCTTAACAGCCT  
CGCAGCCCAGTCACGGCCTGCAGACCCACCAGCATCAGCTCCAAGACTCTCTGCTCGG  
CCCCCTCGCCTCCAGTCTGGTGGACTTGGGGTCTCTCGGTACCAAGCTTAAGTGACTAC  
AAGGATGACGATGACAAGGATTACAAAGACGACGATGATAAGGACTATAAGGATGATG  
ACGACAAATCTAGATAGTTAAACCGCTGATCAGCCTCGACTGTGCCTTCTAGTTGCCAG

Supplementary Table S3

**Mass spectrum results of potential OGT binding targets in BEL7402-LVOGT cell**

| Mass spectrum analysis results |        |              |                                                                                                                                                                                                                                                                                                                                                                                                                                                                                                                                                                                                            |                                                                                      |                 |                         |
|--------------------------------|--------|--------------|------------------------------------------------------------------------------------------------------------------------------------------------------------------------------------------------------------------------------------------------------------------------------------------------------------------------------------------------------------------------------------------------------------------------------------------------------------------------------------------------------------------------------------------------------------------------------------------------------------|--------------------------------------------------------------------------------------|-----------------|-------------------------|
| #                              | Symbol | Matched Term | Synonym(s)                                                                                                                                                                                                                                                                                                                                                                                                                                                                                                                                                                                                 | Entrez Gene Name                                                                     | Location        | Type(s)                 |
| 1                              | ABO    | Q99480       | A3GALNT,A3GALT1,ABO blood group (transferase A, alpha 1-3-N-acetylgalactosaminyltransferase , transferase B, alpha 1-3-galactosyltransferase),ABO blood group (transferase A, $\alpha$ 1-3-N-acetylgalactosaminyltransferase , transferase B, $\alpha$ 1-3-galactosyltransferase),ABO, alpha 1-3-N-acetylgalactosaminyltransferase and alpha 1-3-galactosyltransferase,ABO, $\alpha$ 1-3-N-acetylgalactosaminyltransferase and $\alpha$ 1-3-galactosyltransferase,Abo2,Abo3, Abol1,Gbgt1,GTB,histo-blood group ABO system transferase 2,histo-blood group ABO system transferase 3,LOC687450,NAGAT,NAGAT 2 | ABO, alpha 1-3-N-acetylgalactosaminyltransferase and alpha 1-3-galactosyltransferase | Plasma Membrane | enzyme                  |
| 2                              | ACTB   | B4DW52       | A-X actin,actin,Actin beta,Actin $\beta$ ,actin, beta,actin, $\beta$ ,Actx,beta-actin,BRWS1,E430023M04Rik,Melanoma x actin,PS1TP5BP1, $\beta$ Ca, $\beta$ -actin                                                                                                                                                                                                                                                                                                                                                                                                                                           | actin beta                                                                           | Cytoplasm       | other                   |
| 3                              | ACTL6A | O96019       | 2810432C06Rik,Actin-like 6a,ACTL6,AI851094,ARP4,ARPN-BETA, ARPN- $\beta$ ,Baf53,BAF53A,C79802,INO80K,RGD1307747                                                                                                                                                                                                                                                                                                                                                                                                                                                                                            | actin like 6A                                                                        | Nucleus         | other                   |
| 4                              | ACTN4  | O43707       | ACTININ 4,actinin alpha 4,actinin $\alpha$ 4,actinin, alpha 4,Alpha actinin 4,C77391,FSGS,FSGS1,NON-MUSCLE alpha-ACTININ,NON-MUSCLE $\alpha$ -ACTININ, $\alpha$ -actinin-4                                                                                                                                                                                                                                                                                                                                                                                                                                 | actinin alpha 4                                                                      | Cytoplasm       | transcription regulator |
| 5                              | ADD3   | Q53FL4       | 35H,ADDL,adducin 3,adducin 3 (gamma),adducin 3 ( $\gamma$ ),Adducin-gamma,Adducin- $\gamma$ ,AI4632                                                                                                                                                                                                                                                                                                                                                                                                                                                                                                        | adducin 3                                                                            | Cytoplasm       | other                   |

|    |        |        |                                                                                                                                                                                                                                                                                                                                                                                                                                                                          |                                                   |                 |                         |
|----|--------|--------|--------------------------------------------------------------------------------------------------------------------------------------------------------------------------------------------------------------------------------------------------------------------------------------------------------------------------------------------------------------------------------------------------------------------------------------------------------------------------|---------------------------------------------------|-----------------|-------------------------|
|    |        |        | 85,CPSQ3,gamma ADDUCIN,R75380, $\gamma$ ADDUCIN                                                                                                                                                                                                                                                                                                                                                                                                                          |                                                   |                 |                         |
| 6  | AFG3L2 | D3DUJ0 | 2310036I02RIK,AFG3 like matrix AAA peptidase subunit 2,AFG3-like AAA ATPase 2,AW260507,Emv66,par,SCA28,SPAX5                                                                                                                                                                                                                                                                                                                                                             | AFG3 like matrix AAA peptidase subunit 2          | Cytoplasm       | peptidase               |
| 7  | AGK    | E9PG39 | 2610037M15Rik,6720408I04RIK,acylglycerol kinase,AI465370,CATC5,CTRCT38,FLJ10842,MTDPS10,MULK,RGD1562046                                                                                                                                                                                                                                                                                                                                                                  | acylglycerol kinase                               | Cytoplasm       | kinase                  |
| 8  | AGRN   | O00468 | AGR,AGRIN,CMS8,CMSPPD,LOC100503504,Neural agrin,nmf380                                                                                                                                                                                                                                                                                                                                                                                                                   | agrin                                             | Plasma Membrane | other                   |
| 9  | ANP32E | E9PPH5 | 2810018A15Rik,acidic nuclear phosphoprotein 32 family member E,AI047746,AI326868,CPD1,LANP-L,m LANP-L                                                                                                                                                                                                                                                                                                                                                                    | acidic nuclear phosphoprotein 32 family member E  | Nucleus         | other                   |
| 10 | AP2A2  | O94973 | 2410074K14Rik,Adaptin alpha,Adaptin $\alpha$ ,adaptor related protein complex 2 subunit alpha 2,adaptor related protein complex 2 subunit $\alpha$ 2,adaptor-related protein complex 2, alpha 2 subunit,adaptor-related protein complex 2, $\alpha$ 2 subunit,ADTAB,AF006990,Alpha-adaptin C,AP-2 alpha C subunit,AP-2 $\alpha$ C subunit,AP2,Ap2 alpha,Ap2 alpha C,Ap2 $\alpha$ ,Ap2 $\alpha$ C,AW146353,C78001,CLAPA2,HIP-9,HYPJ,L25,LOC101927462, $\alpha$ -adaptin C | adaptor related protein complex 2 subunit alpha 2 | Cytoplasm       | transporter             |
| 11 | AQR    | A8K6F0 | aquarius,aquarius intron-binding spliceosomal factor,AW495846,fsAP164,IBP160,mKIAA0560                                                                                                                                                                                                                                                                                                                                                                                   | aquarius intron-binding spliceosomal factor       | Nucleus         | other                   |
| 12 | ARID1A | H0Y488 | 1110030E03Rik,AT rich interactive domain 1A (SWI-like),AT-rich interaction domain 1A,B120,BAF250,BAF250A,BM029,C1orf4,CSS2,ELD,hELD,hOSA1,HSP16.2,M                                                                                                                                                                                                                                                                                                                      | AT-rich interaction domain 1A                     | Nucleus         | transcription regulator |

|    |         |        |                                                                                                                                                                                                                                                                                                                                                                                                                                                                                   |                                                                           |                 |             |
|----|---------|--------|-----------------------------------------------------------------------------------------------------------------------------------------------------------------------------------------------------------------------------------------------------------------------------------------------------------------------------------------------------------------------------------------------------------------------------------------------------------------------------------|---------------------------------------------------------------------------|-----------------|-------------|
|    |         |        | RD14,OSA1,P270,SMARCF1                                                                                                                                                                                                                                                                                                                                                                                                                                                            |                                                                           |                 |             |
| 13 | ARMCX3  | A8K5B0 | 1200004E24Rik,AI450003,ALEX3,armadillo repeat containing X-linked 3,armadillo repeat containing, X-linked 3,BM017,dJ545K15.2,GASP6                                                                                                                                                                                                                                                                                                                                                | armadillo repeat containing X-linked 3                                    | Cytoplasm       | other       |
| 14 | ATP1A1  | P05023 | ATP1A1 isoform 1,Atpa-1,ATPase Na+/K+ transporting subunit alpha 1,ATPase Na+/K+ transporting subunit $\alpha$ 1,ATPase, Na+/K+ transporting, alpha 1 polypeptide,ATPase, Na+/K+ transporting, $\alpha$ 1 polypeptide,BC010319,CMT2DD,F1 ATPase alpha,F1 ATPase $\alpha$ ,Lactate dehydrogenase 1, a chain,Na K $\alpha$ 1,Na,K-ATPase $\alpha$ subunit 1,Na/K atpase alpha 1,Na/K atpase alpha 3,Na/K atpase $\alpha$ 1,Na/K atpase $\alpha$ 3,NKA alpha 1,NKA $\alpha$ 1,Nkaa1b | ATPase Na+/K+ transporting subunit alpha 1                                | Plasma Membrane | transporter |
| 15 | ATP2A2  | P16615 | 9530097L16RIK,ATP2B,ATPase sarcoplasmic/endoplasmic reticulum Ca <sup>2+</sup> transporting 2,ATPase, Ca <sup>++</sup> transporting, cardiac muscle, slow twitch 2,Ca-transporting atpase sarcoplasmic reticulum type,D5Wsu150e,DAR,DD,mKIAA4195, Sarcoplasmic reticulum ca <sup>2+</sup> atpase,SERCA2,Serca2a,Serca2a/b,Ser call                                                                                                                                                | ATPase sarcoplasmic/endoplasmic reticulum Ca <sup>2+</sup> transporting 2 | Cytoplasm       | transporter |
| 16 | ATP5F1C | B4DL14 | 1700094F02Rik,ATP synthase F1 subunit gamma,ATP synthase F1 subunit $\gamma$ ,ATP synthase, H <sup>+</sup> transporting, mitochondrial F1 complex, gamma polypeptide 1,ATP synthase, H <sup>+</sup> transporting, mitochondrial F1 complex, $\gamma$ polypeptide 1,ATP5C,ATP5C1,ATP5CL1,F1 $\gamma$ , $\gamma$ subunit f1f0 atpase                                                                                                                                                | ATP synthase F1 subunit gamma                                             | Cytoplasm       | transporter |
| 17 | AURKB   | J3QR41 | AIK2,AIM-1,AIRK2,AL022959,ARK-2,Aurkb,aurkb-sv1,aurkb-sv2,AURORA B,aurora kinase B,IPL1,PPP1R48,Serine/threonine kinase 5,STK-1,STK12,STK5                                                                                                                                                                                                                                                                                                                                        | aurora kinase B                                                           | Nucleus         | kinase      |

|    |        |        |                                                                                                                                                                                                                                                                                                                               |                                                        |                     |                         |
|----|--------|--------|-------------------------------------------------------------------------------------------------------------------------------------------------------------------------------------------------------------------------------------------------------------------------------------------------------------------------------|--------------------------------------------------------|---------------------|-------------------------|
| 18 | BAZ1B  | Q9UIG0 | bromodomain adjacent to zinc finger domain 1B,bromodomain adjacent to zinc finger domain, 1B,C87820,WBSCR10,WBSCR9,WSTF                                                                                                                                                                                                       | bromodomain adjacent to zinc finger domain 1B          | Nucleus             | transcription regulator |
| 19 | BMS1   | Q14692 | AA408648,ACC,AU020092,AU043373, BB007109,BC030906,BMS1 ribosome biogenesis factor,BMS1, ribosome biogenesis factor,BMS1L,KIAA0187,mKIAA0187                                                                                                                                                                                   | BMS1, ribosome biogenesis factor                       | Nucleus             | other                   |
| 20 | CALR   | Q53G71 | Calbindin-57kd,Calregulin,calreticulin, CALRETICULIN isoform 1,cC1qR,CRT,HEL-S-99n,RO,SSA                                                                                                                                                                                                                                     | calreticulin                                           | Cytoplasm           | transcription regulator |
| 21 | CAPZA1 | A8K0T9 | CAPPA1,capping actin protein of muscle Z-line subunit alpha 1,capping actin protein of muscle Z-line subunit $\alpha$ 1,capping protein (actin filament) muscle Z-line, alpha 1,capping protein (actin filament) muscle Z-line, $\alpha$ 1,CAPZ,capZ alpha-1,capZ $\alpha$ -1,CAZ1,LOC684096                                  | capping actin protein of muscle Z-line subunit alpha 1 | Cytoplasm           | other                   |
| 22 | CCDC47 | Q96A33 | 2610204L23RIK,asp4,C88307,calumin, coiled-coil domain containing 47,D13Mgi22,GK001,MSTP041,RGD1308813                                                                                                                                                                                                                         | coiled-coil domain containing 47                       | Extracellular Space | other                   |
| 23 | CCT3   | B4DUR8 | AL024092,CCT-gamma,CCT- $\gamma$ ,Cct1 $\gamma$ ,CCTG,chaperonin containing TCP1 subunit 3,chaperonin containing Tcp1, subunit 3 (gamma),chaperonin containing Tcp1, subunit 3 ( $\gamma$ ),Chaperonin subunit 3 (gamma),Chaperonin subunit 3 ( $\gamma$ ),Matricin,PIG48,TCP-1-gamma,TCP-1- $\gamma$ ,Tcp1-rs3,TriC-P5,TRIC5 | chaperonin containing TCP1 subunit 3                   | Cytoplasm           | other                   |
| 24 | CCT4   | B7Z9L0 | 2610204B21RIK,A45,C78323,CCT-DELTA,CCT- $\delta$ ,Cctd,chaperonin containing TCP1 subunit 4,chaperonin containing Tcp1, subunit 4 (delta),chaperonin containing Tcp1, subunit 4 ( $\delta$ ),SRB,T complex protein 1, delta subunit,T complex protein 1, $\delta$ subunit,TCP1 delta,TCP1 $\delta$                            | chaperonin containing TCP1 subunit 4                   | Cytoplasm           | other                   |

|    |       |        |                                                                                                                                                                                                                                                                                                       |                                                   |                     |                         |
|----|-------|--------|-------------------------------------------------------------------------------------------------------------------------------------------------------------------------------------------------------------------------------------------------------------------------------------------------------|---------------------------------------------------|---------------------|-------------------------|
| 25 | CD44  | H0YD13 | 216062<br>AT,AU023126,AW121933,AW146109,CD44 (containing exon 5),CD44 (soluble),CD44 Antigen,CD44 molecule (Indian blood group),CD44 STANDARD<br>FROM,CD44A,Cd44e,Cd44i,CDW44,CS PG8,ECMR-III,Epican,HCELL,HERMES,Herмес<br>antigen,HUTCH-I,IN,LHR,Ly-24,MC56,MDU2,MDU3,METAA,MIC4,NKT.44,Pgp-1,RHAMM | CD44 molecule (Indian blood group)                | Plasma Membrane     | other                   |
| 26 | CDK12 | Q9NYV4 | 1810022116RIK,AI646528,CRK7,CRKR,CRKRS,cyclin-dependent kinase 12,D11Ert752e,LOC100502717,Pksc                                                                                                                                                                                                        | cyclin dependent kinase 12                        | Nucleus             | kinase                  |
| 27 | CES4A | Q5XG92 | carboxylesterase 4A,CES6,CES8,RGD1307418                                                                                                                                                                                                                                                              | carboxylesterase 4A                               | Extracellular Space | enzyme                  |
| 28 | CHD2  | A8K9Y5 | 2810013C04RIK,2810040A01Rik,5630401D06RIK,AI851092,BC029703,chromodomain helicase DNA binding protein 2,EEOC,LOC283680                                                                                                                                                                                | chromodomain helicase DNA binding protein 2       | Nucleus             | enzyme                  |
| 29 | CHERP | Q8IWX8 | 5730408I11Rik,calcium homeostasis endoplasmic reticulum protein,D8Wsu96e,DAN16,ERPROT213-21,SCAF6,SRA1                                                                                                                                                                                                | calcium homeostasis endoplasmic reticulum protein | Cytoplasm           | other                   |
| 30 | CKAP5 | Q14008 | 3110043H24Rik,4930432B04RIK,CHTOG,cytoskeleton associated protein 5,D730027C18RIK,mKIAA0097,MSPS,T25636,TOG,TOGP                                                                                                                                                                                      | cytoskeleton associated protein 5                 | Nucleus             | transcription regulator |
| 31 | CLDN2 | P57739 | AL022813,Claudin-2,RGD1560247                                                                                                                                                                                                                                                                         | claudin 2                                         | Plasma Membrane     | other                   |
| 32 | COPA  | P53621 | A1LJK,Alpha-coat,Alpha-COP,AU040324,coatomer protein complex subunit alpha,coatomer protein complex subunit<br>$\alpha$ ,HEP-COP,xenin, $\alpha$ -coat, $\alpha$ -COP                                                                                                                                 | coatomer protein complex subunit alpha            | Cytoplasm           | transporter             |



|    |        |        |                                                                                                                                                                                                                                                                                                         |                                       |           |        |
|----|--------|--------|---------------------------------------------------------------------------------------------------------------------------------------------------------------------------------------------------------------------------------------------------------------------------------------------------------|---------------------------------------|-----------|--------|
| 33 | CORO1C | B7Z9V0 | AL022675,AW455561,AW548837,coronin 1C,coronin, actin binding protein 1C,CRN2,HCRNN4,RGD1564490                                                                                                                                                                                                          | coronin 1C                            | Cytoplasm | other  |
| 34 | CSTF1  | B4DDG3 | 1700057K18Rik,AI788832,CF1,cleavage stimulation factor subunit 1,cleavage stimulation factor, 3' pre-RNA, subunit 1,CstF-50,CstFp50                                                                                                                                                                     | cleavage stimulation factor subunit 1 | Nucleus   | other  |
| 35 | CTNND1 | O60716 | AA409437,AU019353,BCDS2,CAS,catenin (cadherin associated protein), delta 1,catenin (cadherin associated protein), $\delta$ 1,catenin delta 1,catenin $\delta$ 1,CATNS,CTNN delta,CTNN delta1,CTNN $\delta$ ,CTNN $\delta$ 1,CTNND,mKIAA0384,P120,p120 Catenin,p120(CAS),p120(CTN),P120CAS,P120CTN,Pp120 | catenin delta 1                       | Nucleus   | other  |
| 36 | DBN1   | Q16643 | D0S117E,drebrin 1,Drebrin E,DREBRIN E2                                                                                                                                                                                                                                                                  | drebrin 1                             | Cytoplasm | other  |
| 37 | DDX10  | Q86VR6 | 4632415A01Rik,AI646054,Dbp4,DEAD (Asp-Glu-Ala-Asp) box polypeptide 10,DEAD-box helicase 10,HRH-J8                                                                                                                                                                                                       | DEAD-box helicase 10                  | Nucleus   | enzyme |
| 38 | DDX18  | Q4ZG72 | 2310005B10Rik,DEAD (Asp-Glu-Ala-Asp) box polypeptide 18,DEAD-box helicase 18,Has1,MrDb                                                                                                                                                                                                                  | DEAD-box helicase 18                  | Nucleus   | enzyme |
| 39 | DDX24  | G3V529 | 1700055J08Rik,2510027P10Rik,AI649272,DEAD (Asp-Glu-Ala-Asp) box polypeptide 24,DEAD-box helicase 24                                                                                                                                                                                                     | DEAD-box helicase 24                  | Nucleus   | enzyme |
| 40 | DDX39B | Q13838 | 0610030D10Rik,AI428441,BAT1,Bat1a,D17H6S81E,D17H6S81E-1,D6S81E,D6S81Eh,DEAD (Asp-Glu-Ala-Asp) box polypeptide 39B,Dead Box RNA Helicase p47,DEAD-box helicase 39B,P47,UAP56                                                                                                                             | DEAD-box helicase 39B                 | Nucleus   | enzyme |
| 41 | DDX41  | B3KRK2 | 2900024F02Rik,AA958953,ABS,AI324246,DEAD (Asp-Glu-Ala-Asp) box polypeptide 41,DEAD-box helicase 41,MPLPF                                                                                                                                                                                                | DEAD-box helicase 41                  | Nucleus   | enzyme |
| 42 | DDX55  | B4DVE4 | 2810021H22Rik,DEAD (Asp-Glu-Ala-Asp) box polypeptide 55,DEAD-box helicase 55,mKIAA1595                                                                                                                                                                                                                  | DEAD-box helicase 55                  | Nucleus   | enzyme |
| 43 | DECR1  | Q16698 | 1200012F07Rik,2,4 Dienoyl Reductase,2,4-Dienoyl coa reductase,2,4-dienoyl CoA reductase 1, mitochondrial,2,4-dienoyl-CoA                                                                                                                                                                                | 2,4-dienoyl-CoA reductase 1           | Cytoplasm | enzyme |

|    |         |        |                                                                                                                                                                                           |                                                   |           |                       |
|----|---------|--------|-------------------------------------------------------------------------------------------------------------------------------------------------------------------------------------------|---------------------------------------------------|-----------|-----------------------|
|    |         |        | reductase 1,DECR,NADPH,SDR18C1                                                                                                                                                            |                                                   |           |                       |
| 44 | DHCR24  | Q3LIE7 | 2310076D10Rik,24-Dehydrocholesterol Reductase,24-Dhcr,3-beta--hydroxysterol delta-24-reductase,3-β--hydroxysterol δ-24-reductase,5830417J06Rik,DCE,KIAA0018,mKIAA0018,Nbla03646,SELA DIN1 | 24-dehydrocholesterol reductase                   | Cytoplasm | enzyme                |
| 45 | DHX16   | Q9P186 | 2410006N22Rik,DBP2,DDX16,DEAH (Asp-Glu-Ala-His) box polypeptide 16,DEAH-box helicase 16,KIAA0577,mKIAA0577,PRO2014,Pr p2,PRP8,PRPF2                                                       | DEAH-box helicase 16                              | Nucleus   | enzyme                |
| 46 | DHX36   | E7EWK3 | 2810407E23Rik,AI452301,AU022184, DDX36,DEAH (Asp-Glu-Ala-His) box polypeptide 36,DEAH-box helicase 36,G4R1,mKIAA1488,MLEL1,RHAU                                                           | DEAH-box helicase 36                              | Cytoplasm | enzyme                |
| 47 | DKC1    | O60832 | BC068171,CBF5,DKC,DKCX,dyskeratosis congenita 1, dyskerin,dyskerin pseudouridine synthase 1,NAP57,NOLA4,Weakly similar to tyrosine-prtein kinase jak3,XAP101                              | dyskerin pseudouridine synthase 1                 | Nucleus   | enzyme                |
| 48 | DNAJB11 | Q9UBS4 | 1810031F23Rik,ABBP-2,AL024055,DJ9 ,DnaJ heat shock protein family (Hsp40) member B11,EDJ,ERdj3,ERj3,ERj3p,LRRGT0008 4,PRO1080,UNQ537                                                      | DnaJ heat shock protein family (Hsp40) member B11 | Cytoplasm | other                 |
| 49 | DPYSL3  | H0YBT4 | CRMP-4,DIHYDROPYRIMIDINASE RELATED protein-3,dihydropyrimidinase-like 3,DRP-3,LCRMP,Tuc-4a,TUC-4b,TUC4,ULIP,ULIP-1                                                                        | dihydropyrimidinase like 3                        | Cytoplasm | enzyme                |
| 50 | EEF1B2  | F8WF65 | 2810017J07Rik,EEF1B,EEF1B1,EF-1 β,EF1B,ELONGATION FACTOR 1 beta,ELONGATION FACTOR 1 β,eukaryotic translation elongation factor 1 beta 2,eukaryotic translation elongation factor 1 β 2    | eukaryotic translation elongation factor 1 beta 2 | Cytoplasm | translation regulator |
| 51 | EEF1D   | P29692 | 1700026P12RIK,Eef1 δ,EF-1-delta,EF-1-δ,EF-1D,EF1B                                                                                                                                         | eukaryotic translation                            | Cytoplasm | translation           |

|    |         |        |                                                                                                                                                                                                                                                                                                                                                                                                                                            |                                                           |           |                       |
|----|---------|--------|--------------------------------------------------------------------------------------------------------------------------------------------------------------------------------------------------------------------------------------------------------------------------------------------------------------------------------------------------------------------------------------------------------------------------------------------|-----------------------------------------------------------|-----------|-----------------------|
|    |         |        | beta,EF1B $\beta$ ,eukaryotic translation elongation factor 1 delta,eukaryotic translation elongation factor 1 delta (guanine nucleotide exchange protein),eukaryotic translation elongation factor 1 $\delta$ ,eukaryotic translation elongation factor 1 $\delta$ (guanine nucleotide exchange protein),FP1047,Tef1 delta,Tef1 $\delta$ ,UNQ601, $\delta$ Ef1                                                                            | n elongation factor 1 delta                               |           | regulator             |
| 52 | EIF2AK2 | P19525 | 2310047A08Rik,4732414G15Rik,AI467567,AI747578,DAI,DOUBLE STRANDED RNA DEPENDENT protein KINASE,EIF2AK1,eukaryotic translation initiation factor 2-alpha kinase 2,eukaryotic translation initiation factor 2- $\alpha$ kinase 2,IFNPKR,p68 kinase,PKR,PPP1R83,PRKR,Tik                                                                                                                                                                      | eukaryotic translation initiation factor 2 alpha kinase 2 | Cytoplasm | kinase                |
| 53 | EIF2S1  | Q53XC0 | 0910001O23Rik,2410026C18Rik,EIF-2, EIF-2A,EIF-2alpha,eIF-2 $\alpha$ ,Eukaryotic Translation Initiation Factor 2 Alpha Subunit,eukaryotic translation initiation factor 2 subunit alpha,eukaryotic translation initiation factor 2 subunit $\alpha$ ,Eukaryotic Translation Initiation Factor 2 $\alpha$ Subunit,eukaryotic translation initiation factor 2, subunit 1 alpha,eukaryotic translation initiation factor 2, subunit 1 $\alpha$ | eukaryotic translation initiation factor 2 subunit alpha  | Cytoplasm | translation regulator |
| 54 | EIF2S3  | P41091 | AA409828,AA547477,AI314668,eIF-2g A,Eif-2gx,EIF2,Eif2 $\gamma$ ,EIF2G,EIF2gamma,Eif2s3x,eukaryotic translation initiation factor 2 subunit gamma,eukaryotic translation initiation factor 2 subunit $\gamma$ ,Eukaryotic translation initiation factor 2, subunit 3,eukaryotic translation initiation factor 2, subunit 3, structural gene X-linked,MEHMO,MRXSBRK,PP42                                                                     | eukaryotic translation initiation factor 2 subunit gamma  | Cytoplasm | translation regulator |
| 55 | EIF3F   | B4DMT5 | 0610037M02Rik,AA409853,eIF3-p47,E if3- $\epsilon$ ,EIF3S5,eukaryotic translation initiation factor 3 subunit F,eukaryotic translation initiation factor 3, subunit                                                                                                                                                                                                                                                                         | eukaryotic translation initiation                         | Cytoplasm | translation regulator |

|    |         |        |                                                                                                                                                                                                                                                                                                    |                                                           |                 |                         |
|----|---------|--------|----------------------------------------------------------------------------------------------------------------------------------------------------------------------------------------------------------------------------------------------------------------------------------------------------|-----------------------------------------------------------|-----------------|-------------------------|
|    |         |        | F                                                                                                                                                                                                                                                                                                  | factor 3 subunit F                                        |                 |                         |
| 56 | ENO1    | P06733 | 0610008115,AL022784,EG433182,Eno1b,ENO1L1,ENOLASE,ENOLASE1,Enolase 1 alpha,Enolase 1 $\alpha$ ,enolase 1, alpha non-neuron,enolase 1, $\alpha$ non-neuron,enolase 1B,retrotransposed,Enolase $\alpha$ ,Gm5506,HEL-S-17,LOC100503183,MBP-1,MPB1,NNE,Phosphopyruvate hydratase,PPH, $\alpha$ enolase | enolase 1                                                 | Cytoplasm       | enzyme                  |
| 57 | EPHB4   | Q96L35 | AI042935,b2b2412Clo,EPH receptor B4,Ephrin b4,HFASD,HTK,MDK2,MYK1,TYRO11                                                                                                                                                                                                                           | EPH receptor B4                                           | Plasma Membrane | kinase                  |
| 58 | EPPK1   | P58107 | 6230424118Rik,EPIPL,EPIPL1,epiplakin 1,EPPK,Eppk1-ps1,LOC686567,PH0268 epidermal autoantigen 450K                                                                                                                                                                                                  | epiplakin 1                                               | Cytoplasm       | other                   |
| 59 | ERAL1   | O75616 | 2610524P08Rik,9130407C09Rik,AU019798,CEGA,ERA,Era (G-protein)-like 1 (E. coli),Era-like 12S mitochondrial rRNA chaperone 1,ERA-W,ERAL1A,ERAL1B,H-ERA,HERA-A,HERA-B,M-ERA,MERA-S,MERA-W,PRLTS6                                                                                                      | Era like 12S mitochondrial rRNA chaperone 1               | Cytoplasm       | other                   |
| 60 | EZH2    | F2YMM1 | EZH2,enhancer of zeste 2 polycomb repressive complex 2 subunit,ENX-1,Enx1h,EZH2b,KMT6,KMT6A,mKIAA4065,WVS,WVS2                                                                                                                                                                                     | enhancer of zeste 2 polycomb repressive complex 2 subunit | Nucleus         | transcription regulator |
| 61 | EZR     | Q6NUR7 | AW146364,CVIL,CVL,Cytovillin2,EZRIN,HEL-S-105,p81,R75297,VIL2                                                                                                                                                                                                                                      | ezrin                                                     | Plasma Membrane | other                   |
| 62 | FAM111B | B4E0T6 | CANP,family with sequence similarity 111 member B,POIKTMP                                                                                                                                                                                                                                          | family with sequence similarity 111 member B              | Other           | other                   |
| 63 | FAM120A | Q9NZB2 | C9orf10,family with sequence similarity 120, member A,family with sequence similarity 120A,HBVPTPAP,LOC679485,OSSA,RGD1306643,Similar to protein C9orf10                                                                                                                                           | family with sequence similarity 120A                      | Cytoplasm       | other                   |

|    |        |        |                                                                                                                                                                                                                                                                                                                         |                                            |           |        |
|----|--------|--------|-------------------------------------------------------------------------------------------------------------------------------------------------------------------------------------------------------------------------------------------------------------------------------------------------------------------------|--------------------------------------------|-----------|--------|
| 64 | FARSA  | K7ER16 | 0610012A19Rik,CML33,FARSL,FARSLA,FRSA,PheHA,Phenylalanine-tRNA synthetase-like, alpha-subunit,Phenylalanine-tRNA synthetase-like, α-subunit,phenylalanyl-tRNA synthetase subunit alpha,phenylalanyl-tRNA synthetase subunit α,phenylalanyl-tRNA synthetase, alpha subunit,phenylalanyl-tRNA synthetase, α subunit,pherS | phenylalanyl-tRNA synthetase subunit alpha | Cytoplasm | enzyme |
| 65 | FASN   | P49327 | A630082H08Rik,FAS,fatty acid synthase,Long chain fatty acyl-coa synthetase,NADP Dependent Oxidoreductase,nFAS,OA-519,SDR27X1                                                                                                                                                                                            | fatty acid synthase                        | Cytoplasm | enzyme |
| 66 | FIP1L1 | B4DTW7 | 1300019H17RIK,1300019h17Riken,DK FZp586K0717,factor interacting with PAPOLA and CPSF1,FIP1,hFip1,Rhe,Rje                                                                                                                                                                                                                | factor interacting with PAPOLA and CPSF1   | Nucleus   | other  |
| 67 | FLNB   | O75369 | ABP-278,ABP-280,AL024016,AOI,Beta-filamin,FH1,Filamin 3,Filamin B,Filamin homolog 1,filamin, beta,filamin, β,FLN1L,FLN3,Flnb predicted,LRS1,SCT,TABP,TAP,Thyroid autoantigen,β-filamin                                                                                                                                  | filamin B                                  | Cytoplasm | other  |
| 68 | GNAI3  | P08754 | 87U6,AI158965,ARCND1,AW537698,G alpha I3,G protein subunit alpha i3,G protein subunit α i3,G α I3,G-I3,G-protein α i3,GI alpha3,GIP3A,guanine nucleotide binding protein (G protein), alpha inhibiting 3,guanine nucleotide binding protein (G protein), α inhibiting 3,STIMULATORY G                                   | G protein subunit alpha i3                 | Cytoplasm | enzyme |
| 69 | GNL2   | Q5T0F3 | BC003262,G protein nucleolar 2,guanine nucleotide binding protein-like 2 (nucleolar),HUMAUANTIG,LOC633966 ,NGP1,Nog2,Nug2,RGD1305006                                                                                                                                                                                    | G protein nucleolar 2                      | Nucleus   | enzyme |
| 70 | GNL3L  | Q05DU1 | BC020354,G protein nucleolar 3 like,GNL3B,guanine nucleotide                                                                                                                                                                                                                                                            | G protein nucleolar                        | Nucleus   | other  |

|    |          |        |                                                                                                                                                                                                               |                                                |           |                         |
|----|----------|--------|---------------------------------------------------------------------------------------------------------------------------------------------------------------------------------------------------------------|------------------------------------------------|-----------|-------------------------|
|    |          |        | binding protein-like 3 (nucleolar)-like                                                                                                                                                                       | 3 like                                         |           |                         |
| 71 | GTF3C4   | Q05CN7 | 5330400C03,AI426938,AU014771,AU017413,general transcription factor IIC subunit 4,general transcription factor IIC, polypeptide 4,KAT12,LOC687576,TF3C-delta,TF3C-delta,TFIII90,TFIIIC290,TFIIIC90,TFIIICDELTA | general transcription factor IIC subunit 4     | Nucleus   | transcription regulator |
| 72 | GTF3C5   | Q5T7U1 | 2700084A09RIK,general transcription factor IIC subunit 5,general transcription factor IIC, polypeptide 5,HLH Transcription Factor 4,TFIIC2-63,TFIIC63,TFIICepsilon                                            | general transcription factor IIC subunit 5     | Nucleus   | transcription regulator |
| 73 | GTPBP6   | O43824 | AV119224,GTP binding protein 6 (putative),LOC100132347,LOC100133897,LOC100292716,LOC100508214,LOC100509054,LOC100510550,LOC100510565,Pgbpll,PGPL                                                              | GTP binding protein 6 (putative)               | Other     | other                   |
| 74 | HCFC1    | P51610 | AW060991,CFF,HCF,HCF-1,HFC1,host cell factor C1,MRX3,PPP1R89,RGD1563804,VCAF                                                                                                                                  | host cell factor C1                            | Nucleus   | transcription regulator |
| 75 | HIST1H1C | P16403 | 0610008C09Rik,H1.2,H1C,H1F2,H1s-1,H1var1,His1a,histone cluster 1 H1 family member c,histone cluster 1, H1c,Histone h1, member 2,Histone h1.2                                                                  | histone cluster 1 H1 family member c           | Nucleus   | other                   |
| 76 | HKDC1    | B4E0J9 | BC016235,FLJ22761,hexokinase domain containing 1                                                                                                                                                              | hexokinase domain containing 1                 | Cytoplasm | kinase                  |
| 77 | HNRNPD   | H0YA96 | AUF1,AUF1A,C230004L04,heterogeneous nuclear ribonucleoprotein D,HnRNP UP2,hnRNP D,HNRNPD,P37                                                                                                                  | heterogeneous nuclear ribonucleoprotein D      | Nucleus   | transcription regulator |
| 78 | HNRNPD L | O14979 | AA407431,AA959857,D5Erttd650e,D5Wsu145e,heterogeneous nuclear ribonucleoprotein D-like,HNRDL,HNRNP,HNRNP-D LIKE,Hnrnpd1,HNRPDL,JKTBP,JKTBP1,JKTBP2,laAUF1,LGMD1G                                              | heterogeneous nuclear ribonucleoprotein D like | Nucleus   | other                   |
| 79 | HP1BP3   | B0QZK4 | heterochromatin protein 1 binding                                                                                                                                                                             | heterochromatin protein 1 binding              | Nucleus   | other                   |

|    |           |        |                                                                                                                                                                                                                                                                                                                                                                                                                                                                                                                                               |                                                      |           |             |
|----|-----------|--------|-----------------------------------------------------------------------------------------------------------------------------------------------------------------------------------------------------------------------------------------------------------------------------------------------------------------------------------------------------------------------------------------------------------------------------------------------------------------------------------------------------------------------------------------------|------------------------------------------------------|-----------|-------------|
|    |           |        | protein 3, heterochromatin protein 1, binding protein 3, HP1-BP74                                                                                                                                                                                                                                                                                                                                                                                                                                                                             | omatin protein 1 binding protein 3                   |           |             |
| 80 | HSP90A A1 | K9JA46 | AL024080, AL024147, EL52, Heat shock protein 1, alpha, Heat shock protein 1, $\alpha$ , heat shock protein 90 alpha family class A member 1, heat shock protein 90 $\alpha$ family class A member 1, heat shock protein 90, alpha (cytosolic), class A member 1, heat shock protein 90, $\alpha$ (cytosolic), class A member 1, HEL-S-65p, Hsp103, hsp4, HSP86, Hsp86-1, Hsp89, Hsp89-alpha-delta-N, Hsp89- $\alpha$ - $\delta$ -N, HSP89A, Hsp90, HSP90-alpha, HSP90- $\alpha$ , HSP90A, HSP90N, HSPC1, HSPCA, HSPCAL1, HSPCAL4, HSPN, LAP-2 | heat shock protein 90 alpha family class A member 1  | Cytoplasm | enzyme      |
| 81 | IGHMBP2   | F5H5K3 | AEP, CATF1, CMT2S, HCSA, HMN6, immunoglobulin mu binding protein 2, immunoglobulin mu DNA binding protein 2, nmd, RIPE3b1, sma, SMARD1, Smbp-2, SMUBP2, ZFAND7                                                                                                                                                                                                                                                                                                                                                                                | immunoglobulin mu DNA binding protein 2              | Nucleus   | enzyme      |
| 82 | IGKV2-29  | A2NJV5 | A18, A18b, IGKV, IGVK-A18, immunoglobulin kappa variable 2-29 (gene/pseudogene), immunoglobulin $\kappa$ variable 2-29 (gene/pseudogene)                                                                                                                                                                                                                                                                                                                                                                                                      | immunoglobulin kappa variable 2-29 (gene/pseudogene) | Other     | other       |
| 83 | ITPR3     | Q14573 | inositol 1,4,5-triphosphate receptor 3, inositol 1,4,5-triphosphate receptor type 3, inositol 1,4,5-triphosphate receptor, type 3, IP3R, IP3R-3, IP3R3X, tf                                                                                                                                                                                                                                                                                                                                                                                   | inositol 1,4,5-triphosphate receptor type 3          | Cytoplasm | ion channel |
| 84 | KIF23     | Q02241 | 3110001D19Rik, C87313, CHO1, kinesin family member 23, Kinesin-like 5, KNSL5, MKLP-1                                                                                                                                                                                                                                                                                                                                                                                                                                                          | kinesin family member 23                             | Cytoplasm | other       |
| 85 | KIF2A     | B0AZS5 | C530030B14RIK, CDCBM3, HK2, KHC2, KIF2, Kinesin 2, kinesin family member 2A, KNS2, M-kinesin                                                                                                                                                                                                                                                                                                                                                                                                                                                  | kinesin family member 2A                             | Cytoplasm | other       |

|    |          |        |                                                                                                                                                                 |                            |                 |                        |
|----|----------|--------|-----------------------------------------------------------------------------------------------------------------------------------------------------------------|----------------------------|-----------------|------------------------|
| 86 | KIFC1    | B4DMA8 | Gm4137,HSET,KIFC5A,Kifc5b,kinesin family member C1,kinesin family member C5B,KINESIN-RELATED,KNLS2,Knsl2a,LOC100044006,LOC100044746,MHCB,MKLP2,Tctex-7,Tctex-7A | kinesin family member C1   | Nucleus         | enzyme                 |
| 87 | KRT13    | K7ERE3 | CK13,K13,Ka13,Ker47,keratin 13,Keratin complex 1, acidic, gene 13,Krt-1.13,KRT1-13,WSN2                                                                         | keratin 13                 | Cytoplasm       | other                  |
| 88 | KRT18    | B2RA03 | 48-kD Keratin,Ck D,CK-18,CYK18,K18,K1cr,keratin 18,Keratin complex 1 acidic gene 18,KRT1-18                                                                     | keratin 18                 | Cytoplasm       | other                  |
| 89 | KRT19    | P08727 | Al663979,CK19,EndoC,K19,K1CS,Ka19,keratin 19,Krt-1.19,Krt1-19                                                                                                   | keratin 19                 | Cytoplasm       | other                  |
| 90 | KRT2     | P35908 | BB005427,CK-2e,K2e,keratin 2,Krt2-2,KRT2A,KRT2E,KRTE                                                                                                            | keratin 2                  | Cytoplasm       | other                  |
| 91 | KRT20    | P35900 | 9030623C06RIK,CD20,CK-20,CYTOKERATIN20,K20,KER20,keratin 20,KRT21                                                                                               | keratin 20                 | Cytoplasm       | other                  |
| 92 | KRT78    | Q8N1N4 | 2310030B04Rik,CK-78,K5B,K78,Kb40,keratin 78                                                                                                                     | keratin 78                 | Cytoplasm       | other                  |
| 93 | KRT8     | P05787 | AA960620,AL022697,AU019895,CARD 2,Ck A,CK-8,CYK8,CYKER,Ecp,EndoA,K2C8,K8,Ker8,keratin 8,Keratin complex 2, basic, gene 8,KO,Krt-2.8,Krt2-8                      | keratin 8                  | Cytoplasm       | other                  |
| 94 | LGALS3BP | B4DVE1 | 90K,BTBD17B,CyCAP,Gal-3BP,galectin 3 binding protein,gp90,lectin,galactoside-binding, soluble, 3 binding protein,M2BP,MAC-2-BP,mama,PPICAP,TANGO10B             | galectin 3 binding protein | Plasma Membrane | transmembrane receptor |
| 95 | LMNA     | Q5TCI8 | CDCD1,CDDC,CMD1A,CMT2B1,Dhe,EMD2,FPL,FPLD,FPLD2,HGPS,IDC,lamin A,LAMIN A/C,LAMININ A/C,LDP1,LFP,LGMD1B,LMN1,LMNC,LMNL1,MADA,PRO1                                | lamin A/C                  | Nucleus         | other                  |
| 96 | LMO7     | E9PMP7 | C130003G01,C78582,E030010D13,FBX20,FBXO20,Gm914,KIAA0858,LIM domain 7,LIM domain only 7,LMO7b,LOMP,mKIAA0858,ZFDCP                                              | LIM domain 7               | Cytoplasm       | enzyme                 |
| 97 | LONP1    | K7EJE8 | 1200017E13Rik,CODASS,hLON,LON,lon peptidase 1, mitochondrial,LonHS,LONP,Mitochondrial LON Protease,PIM1,Protease,                                               | lon peptidase 1, mitochond | Cytoplasm       | peptidase              |



|     |        |        |                                                                                                                                                                                                                                                                                     |                                                        |                     |        |
|-----|--------|--------|-------------------------------------------------------------------------------------------------------------------------------------------------------------------------------------------------------------------------------------------------------------------------------------|--------------------------------------------------------|---------------------|--------|
|     |        |        | serine, 15,PRSS15                                                                                                                                                                                                                                                                   | drial                                                  |                     |        |
| 98  | LRWD1  | H7C5S6 | 1200011O22Rik,AU042569,AW548074,CENP-33,leucine-rich repeats and WD repeat domain containing 1,ORCA                                                                                                                                                                                 | leucine rich repeats and WD repeat domain containing 1 | Nucleus             | other  |
| 99  | LSG1   | Q9H089 | 5830465I20,AA409273,D16Bwg1547e, large 60S subunit nuclear export GTPase 1,RGD1309089                                                                                                                                                                                               | large 60S subunit nuclear export GTPase 1              | Cytoplasm           | enzyme |
| 100 | LUC7L3 | Q6PKC2 | 3300001P08Rik,CISPLATIN RESISTANCE,CRA,CREAP-1,CROP,hLuc7A,LUC7-like 3 (S. cerevisiae),LUC7-like 3 pre-mRNA splicing factor,LUC7A,OA48-18,RGD1307981                                                                                                                                | LUC7 like 3 pre-mRNA splicing factor                   | Nucleus             | other  |
| 101 | LYAR   | A8K3Y5 | Ly1 antibody reactive,Ly1 antibody reactive clone,MLZ-264,ZC2HC2,ZLYAR                                                                                                                                                                                                              | Ly1 antibody reactive                                  | Plasma Membrane     | other  |
| 102 | MARS   | A8K492 | CMT2U,ILFS2,ILLD,methionine-tRNA synthetase,methionyl-tRNA synthetase,METRS,MRS,MTRNS,SPG70                                                                                                                                                                                         | methionyl-tRNA synthetase                              | Cytoplasm           | enzyme |
| 103 | MRPS31 | Q92665 | 1500002D03Rik,AA960481,Imogen38, Imogen44,IMOGN38,mitochondrial ribosomal protein S31,S31mt                                                                                                                                                                                         | mitochondrial ribosomal protein S31                    | Cytoplasm           | other  |
| 104 | MYH10  | P35580 | 5730504C04Rik,9330167F11Rik,Fltn,H SME6,IIB,MCH-B,MHC IIB,MIIB,mKIAA3005,MYHN2,myosin heavy chain 10,Myosin IIB,myosin, heavy polypeptide 10, non-muscle,Nm HC myosin B,NM Myosin-HC,NMHC II-B,NMHC-B,NMMHC-B,NMMHC-IIB, Nonmuscle myosin II,NONMUSCLE MYOSIN2B,SMemb,SMemb variant | myosin heavy chain 10                                  | Cytoplasm           | enzyme |
| 105 | MYH14  | Q7Z406 | 2400004E04RIK,DFNA4,DFNA4A,FP17425,II-C,Kv3,MHC IIC,MHC16,MYH17,myosin,myosin                                                                                                                                                                                                       | myosin heavy chain 14                                  | Extracellular Space | enzyme |

|     |        |        |                                                                                                                                                                                                                                                                     |                                                          |           |                         |
|-----|--------|--------|---------------------------------------------------------------------------------------------------------------------------------------------------------------------------------------------------------------------------------------------------------------------|----------------------------------------------------------|-----------|-------------------------|
|     |        |        | heavy chain 14,Myosin IIC,myosin, heavy polypeptide 14,NHMCII,NMHC II,NMHC-II-C,PNMHH                                                                                                                                                                               |                                                          |           |                         |
| 106 | MYH9   | P35579 | BDPLT6,DFNA17,EPSTS,FLTN,FTNS,MA TINS,MHA,MIIA,MNMM IIA,Myhn-1,Myosib IIA,MYOSIN HEAVY CHAIN 9,Myosin IIA,myosin, heavy chain 9, non-muscle,myosin, heavy polypeptide 9, non-muscle,NM-IIA,NMHC-II-A,NMM HC-A,NMMHC-IIA,NONMUSCLE MYOSIN2 HEAVY CHAIN type A,TU72.6 | myosin heavy chain 9                                     | Cytoplasm | enzyme                  |
| 107 | MYO1D  | O94832 | 9930104H07RIK,AW544947,D11Ertd9 e,LOC102724697,Myo1c,myosin ID,myosin-1d,Myr2,Myr4,PPP1R108                                                                                                                                                                         | myosin ID                                                | Cytoplasm | enzyme                  |
| 108 | MYO5B  | Q7Z7A5 | AI661750,LOC269036,mKIAA1119,Myosin 5b,Myosin VB,Myr6                                                                                                                                                                                                               | myosin VB                                                | Cytoplasm | enzyme                  |
| 109 | NARS2  | H0YEL9 | AI875199,asnRS,asparaginyI-tRNA synthetase 2 (mitochondrial)(putative),asparaginyI-tRNA synthetase 2, mitochondrial,DFNB94,RGD1305145,S LM5                                                                                                                         | asparaginy I-tRNA synthetase 2, mitochondrial            | Cytoplasm | enzyme                  |
| 110 | NCBP1  | Q09161 | AU014645,AW538051,CBP80,NCBP,NCBP 80 kDa subunit,Nuclear cap binding protein 80 kd,nuclear cap binding protein subunit 1,Sto1                                                                                                                                       | nuclear cap binding protein subunit 1                    | Nucleus   | other                   |
| 111 | NGDN   | Q8NEJ9 | 1500001L15Rik,C14orf120,CANu1,LCP 5,lpd-2,neuroguidin,neuroguidin, EIF4E binding protein,NGD,RGD1310211                                                                                                                                                             | neuroguidin                                              | Nucleus   | other                   |
| 112 | NMNAT1 | Q53GL1 | 2610529L11Rik,5730441G13Rik,D4Col e1e,LCA9,nicotinamide nucleotide adenylyltransferase 1,NMNAT,PNAT1                                                                                                                                                                | nicotinamide nucleotide adenylyltransferase 1            | Nucleus   | enzyme                  |
| 113 | NOC2L  | Q9H9J5 | AA410003,AF155546,Gm3811,Inhibitor of histone deacetyltransferase,NET15,NET7,NIR, NOC2-like nucleolar associated transcriptional repressor,PPP1R112,RGD1309387                                                                                                      | NOC2 like nucleolar associated transcriptional repressor | Nucleus   | transcription regulator |

|     |        |        |                                                                                                                                                                                                                                                                                                                                                       |                                                           |           |            |
|-----|--------|--------|-------------------------------------------------------------------------------------------------------------------------------------------------------------------------------------------------------------------------------------------------------------------------------------------------------------------------------------------------------|-----------------------------------------------------------|-----------|------------|
| 114 | NUMA1  | Q14980 | 41/7<br>NMP,6720401E04Rik,AA764025,AL022610,AU014979,NMP<br>41/7,NMP-22,NUCLEAR MATRIX<br>ANTIGEN,nuclear mitotic apparatus<br>protein 1,NUMA                                                                                                                                                                                                         | nuclear<br>mitotic<br>apparatus<br>protein 1              | Nucleus   | other      |
| 115 | NUP205 | Q92621 | 3830404O05Rik,AV248391,C7ORF14,K<br>IAA0225,mKIAA0225,NPHS13,nucleop<br>orin 205,Nucleoporin Nup205,Riken<br>cDNA 3830404o05,Similar to CG11943<br>gene product                                                                                                                                                                                       | nucleopori<br>n 205                                       | Nucleus   | other      |
| 116 | PBRM1  | H0Y5B5 | 2610016F04Rik,AI507524,BAF180,PB1<br>,polybromo 1,RGD1565549                                                                                                                                                                                                                                                                                          | polybromo<br>1                                            | Nucleus   | other      |
| 117 | PCNA   | Q6FI35 | ATLD2,Pcna/cyclin,PCNAR,proliferating<br>cell nuclear antigen                                                                                                                                                                                                                                                                                         | proliferati<br>ng cell<br>nuclear<br>antigen              | Nucleus   | enzym<br>e |
| 118 | PDCD11 | Q14690 | 1110021I22Rik,ALG-4,KIAA0185,mKIA<br>A0185,NFBP,Pdcd7,programmed cell<br>death 11,RRP5                                                                                                                                                                                                                                                                | programm<br>ed cell<br>death 11                           | Nucleus   | other      |
| 119 | PDIA6  | Q15084 | 1700015E05Rik,AL023058,C77895,Ca<br>BP1,CaBP5,ERP5,LOC100046302,P5,Pd<br>i-p5,PDIA6 isoform 2,PDIR5,Protein<br>disulfide isomerase A6<br>precursor,protein disulfide isomerase<br>associated 6,protein disulfide<br>isomerase family A member 6,protein<br>disulfide isomerase family A, member<br>6,Similar to disulfide isomerase<br>related,TXNDC7 | protein<br>disulfide<br>isomerase<br>family A<br>member 6 | Cytoplasm | enzym<br>e |
| 120 | PLEC   | Q15149 | AA591047,AU042537,EBS1,EBSMD,EB<br>SND,EBSO,EBSOG,EBSPA,HD1,LGMD2<br>Q,PCN,PLEC1,PLEC1b,Plectin,PLTN                                                                                                                                                                                                                                                  | plectin                                                   | Cytoplasm | other      |
| 121 | PNO1   | F8WBJ6 | 1810003N24RIK,AA407421,AU015468<br>,AU019495,AU042323,Emi3,Imi3,KHR<br>BP1,LOC56902,partner of NOB1<br>homolog,RRP20                                                                                                                                                                                                                                  | partner of<br>NOB1<br>homolog                             | Nucleus   | other      |
| 122 | POLR1C | H0Y723 | AA409007,AA959927,Ac2-127,AC40,A<br>L024089,HLD11,Polr1e,polymerase<br>(RNA) I polypeptide C,RNA<br>polymerase I and III subunit<br>C,RPA39,RPA40,RPA5,RPAC1,RPC40,RP<br>O1-1,TCS3                                                                                                                                                                    | RNA<br>polymeras<br>e I and III<br>subunit C              | Nucleus   | enzym<br>e |

|     |        |        |                                                                                                                                                                                                                                                                                                          |                                                  |           |                         |
|-----|--------|--------|----------------------------------------------------------------------------------------------------------------------------------------------------------------------------------------------------------------------------------------------------------------------------------------------------------|--------------------------------------------------|-----------|-------------------------|
| 123 | POLR2A | P24928 | hRPB220,hsRPB1,Pol II Largest Subunit,Pol II subunit,Pol II (RNA directed) polymerase (RNA) II, polymerase (RNA) II (DNA directed) polypeptide A, RNA pol iia, RNA POLYMERASE II LARGE subunit, RNA polymerase II subunit A, RNAP II, RNAPLS, RNAPIIA, RPB1, RPBh1, Rpii215, RpiILS, RPO2, Rpo2-1, RPOL2 | RNA polymerase II subunit A                      | Nucleus   | enzyme                  |
| 124 | PPIB   | P23284 | AA408962, AA553318, AI844835, Cphn-2, CyP-20b, CYP-S1, CYPB, HEL-S-39, OI9, peptidylprolyl isomerase B, SCYLP                                                                                                                                                                                            | peptidylprolyl isomerase B                       | Cytoplasm | enzyme                  |
| 125 | PRKDC  | P78527 | AI326420, AU019811, DNA-DEPENDENT protein KINASE, DNA-PKC, DNA-PKcs, DNAPDcs, DNAPK, DNPK1, DOXNPH, dxnph, HYRC, HYRC1, IMD26, p350, p460, Prkdc predicted, protein kinase, DNA activated, catalytic polypeptide, protein kinase, DNA-activated, catalytic subunit, scid, slip, XRCC7                    | protein kinase, DNA-activated, catalytic subunit | Nucleus   | kinase                  |
| 126 | PRPF6  | O94906 | 1190003A07Rik, 2610031L17Rik, ANT-1, C20orf14, hPrp6, pre-mRNA processing factor 6, pre-mRNA splicing factor 6, PRP6, PUTATIVE MITOCHONDRIAL OUTER MEMBRANE protein IMPORT receptor, RGD1307103, RP60, SNRNP102, TOM, U5 snRNP-associated 102 kDa, U5-102K                                               | pre-mRNA processing factor 6                     | Nucleus   | transcription regulator |
| 127 | PRRC2C | Q9Y520 | 1810043M20RIK, 9630039I18Rik, A630006J20, BAT2-iso, Bat2d, BAT2D1, BAT2L2, E130112L15Rik, mKIAA1096, proline-rich coiled-coil 2C, Prrc3, XTP2                                                                                                                                                            | proline rich coiled-coil 2C                      | Cytoplasm | other                   |
| 128 | PSMA4  | H0YLS6 | 20S PROTEASOME alpha 4 subunit, 20S PROTEASOME alpha 4 subunit, C9, HC9, HsT17706, Macropain subunit C9, proteasome (prosome, macropain) subunit, alpha type 4, proteasome (prosome, macropain) subunit, alpha type 4, proteasome subunit alpha 4, Proteasome subunit                                    | proteasome subunit alpha 4                       | Cytoplasm | peptidase               |

|     |       |        |                                                                                                                                                      |                                              |           |                         |
|-----|-------|--------|------------------------------------------------------------------------------------------------------------------------------------------------------|----------------------------------------------|-----------|-------------------------|
|     |       |        | c9,proteasome subunit $\alpha$ 4,Proteasome subunit $\alpha$ 4,PSC9                                                                                  |                                              |           |                         |
| 129 | PURB  | Q96QR8 | 2310015K15Rik,AA114818,Cager-2,D11BWG0414E,LOC100503489,Pur $\beta$ ,PURBETA,purine rich element binding protein B                                   | purine rich element binding protein B        | Nucleus   | transcription regulator |
| 130 | QARS  | Q53HS0 | 1110018N24Rik,1200016L19Rik,C80286,GLNRS,glutamine--tRNA ligase-like,GLUTAMINYL TRANS SYNTHASE,glutaminyl-tRNA synthetase,LOC100911132,MSCCA,PRO2195 | glutaminyl-tRNA synthetase                   | Cytoplasm | enzyme                  |
| 131 | RALY  | Q5QPL9 | A1663842,hnRNP-associated with lethal yellow,HNRPCL2,Merc,P542,RALY heterogeneous nuclear ribonucleoprotein,RNA binding protein Raly/Merc            | RALY heterogeneous nuclear ribonucleoprotein | Nucleus   | transcription regulator |
| 132 | RBM25 | P49756 | fSAP94,NET52,RED120,RNA binding motif 25,RNPC7,S164,Snu71,U1 small ribonucleoprotein 1                                                               | RNA binding motif protein 25                 | Nucleus   | other                   |
| 133 | RBM47 | D6R9D6 | 9530077J19Rik,FLJ20273,NET18,RGD1359713,RNA binding motif protein 47                                                                                 | RNA binding motif protein 47                 | Nucleus   | other                   |
| 134 | RCN2  | H0YL43 | AA408742,E6BP,ERC-55,Reticulocalbin 2,TCBP49                                                                                                         | reticulocalbin 2                             | Cytoplasm | other                   |
| 135 | RNF2  | Q99496 | A1326319,AI450156,AU019207,BAP-1,DING,HIPI3,ring finger protein 2,RING1B,RING2                                                                       | ring finger protein 2                        | Nucleus   | transcription regulator |
| 136 | RNMT  | K7EP06 | 2610002P10Rik,AI848273,cm1p,CMT1,CMT1c,hCMT1,hMet,MET,mKIAA0398,RG7MT1,RNA (guanine-7-) methyltransferase,RNA guanine-7 methyltransferase            | RNA guanine-7 methyltransferase              | Nucleus   | enzyme                  |
| 137 | RPL13 | Q6NZ55 | A52,BBC1,D16S444E,D16S44E,Gm10071,L13,ribosomal protein L13,ribosomal protein L13,pseudogene 6,Rpl13-ps6                                             | ribosomal protein L13                        | Nucleus   | other                   |
| 138 | RPL17 | J3QS96 | ASI,Gm14934,L17,LOC100133240,PD-1,ribosomal protein L17,ribosomal                                                                                    | ribosomal protein                            | Cytoplasm | other                   |

|     |         |        |                                                                                                                                                                                                                                                                                        |                                                |           |                         |
|-----|---------|--------|----------------------------------------------------------------------------------------------------------------------------------------------------------------------------------------------------------------------------------------------------------------------------------------|------------------------------------------------|-----------|-------------------------|
|     |         |        | protein L17, pseudogene 8,Rpl17-ps8,RPL23                                                                                                                                                                                                                                              | L17                                            |           |                         |
| 139 | RPL21   | Q6IAX2 | 8430440E03Rik,HYPT12,L21,ribosomal protein L21                                                                                                                                                                                                                                         | ribosomal protein L21                          | Cytoplasm | other                   |
| 140 | RPL7L1  | Q6DKI1 | 1500016H10Rik,dJ475N16.4,RGD1308469,ribosomal protein L7-like 1                                                                                                                                                                                                                        | ribosomal protein L7 like 1                    | Cytoplasm | transcription regulator |
| 141 | RPN2    | P04844 | 1300012C06Rik,AV261018,RIBIIR,ribophorin II,RPN-II,SWP1                                                                                                                                                                                                                                | ribophorin II                                  | Cytoplasm | enzyme                  |
| 142 | RPP30   | Q5VU11 | LOC283012,LOC687772,ribonuclease P/MRP 30 subunit,ribonuclease P/MRP subunit p30,RNASEP2,TSG15                                                                                                                                                                                         | ribonuclease P/MRP subunit p30                 | Nucleus   | enzyme                  |
| 143 | RPS6    | Q96DV6 | 40S ribosomal protein S6-like,LOC100911372,pp33,Q9BZU1,RIBOSOMAL protein S6,S6,S6R,S6RP                                                                                                                                                                                                | ribosomal protein S6                           | Cytoplasm | other                   |
| 144 | RUVBL2  | Q9Y230 | CGI-46,ECP-51,INO80J,mp47,p47,REPTIN,RuvB like DNA helicase,RuvB-like AAA ATPase 2,RuvB-like protein 2,RUVB2,RVB2,TAP54-beta,TAP54-β,TIH2,TIP48,TIP49B                                                                                                                                 | RuvB like AAA ATPase 2                         | Nucleus   | transcription regulator |
| 145 | SAP30BP | Q9UHR5 | 2700016D05Rik,HCNGP,HTRG,HTRP,RGD1565537,SAP30 binding protein                                                                                                                                                                                                                         | SAP30 binding protein                          | Nucleus   | transcription regulator |
| 146 | SART1   | B4DDH9 | Ara1,HAF,HOMS1,SART1, U4/U6.U5 tri-snRNP-associated protein 1,SART1259,SNRNP110,Snu66,SPF107,squamous cell carcinoma antigen recognized by T cells 1,SSCA1,U5-110K                                                                                                                     | SART1, U4/U6.U5 tri-snRNP-associated protein 1 | Nucleus   | other                   |
| 147 | SF3B4   | Q53FG6 | AFD1,Hsh49,SAP49,SF3b49,SF3b50,SP LICING FACTOR 3B subunit4,splicing factor 3b, subunit 4                                                                                                                                                                                              | splicing factor 3b subunit 4                   | Nucleus   | other                   |
| 148 | SFPQ    | Q9BSV4 | 1110004P21RIK,2810416M14Rik,5730453G22RIK,9030402K04Rik,AU021830,D4Erttd314e,Gm12940,LOC100504686,LOC100506168,LOC252855,Myoblast Antigen 24.1D5,POMP100,PPP1R140,PSF,Ptb associated splicing factor,REP1,splicing factor proline and glutamine rich,splicing factor proline/glutamine | splicing factor proline and glutamine rich     | Nucleus   | transcription regulator |

|     |          |        |                                                                                                                                                                                                                                   |                                                                                                   |                 |                         |
|-----|----------|--------|-----------------------------------------------------------------------------------------------------------------------------------------------------------------------------------------------------------------------------------|---------------------------------------------------------------------------------------------------|-----------------|-------------------------|
|     |          |        | rich (polypyrimidine tract binding protein associated)                                                                                                                                                                            |                                                                                                   |                 |                         |
| 149 | SFXN3    | Q9BWM7 | BA108L7.2,LOC65042,SFX3,sideroflexin 3,SLC56A3,SLC64A3,TCC                                                                                                                                                                        | sideroflexin 3                                                                                    | Cytoplasm       | transporter             |
| 150 | SIX1     | Q15475 | BB138287,BOS3,DFNA23,sine oculis-related homeobox 1,SIX homeobox 1,TIP39                                                                                                                                                          | SIX homeobox 1                                                                                    | Nucleus         | transcription regulator |
| 151 | SLC12A2  | P55011 | 9330166H04Rik,BSC,BSC2,mBSC2,Na-k-cl cotransporter,NKCC1,PPP1R141,solute carrier family 12 member 2,solute carrier family 12, member 2,sy-ns                                                                                      | solute carrier family 12 member 2                                                                 | Plasma Membrane | transporter             |
| 152 | SLC25A22 | E9PJH7 | 1300006L01RIK,AI060884,EIEE3,GC-1, LOC100911440,mitochondrial glutamate carrier 1-like,NET44,RGD1307826,solute carrier family 25 (mitochondrial carrier, glutamate), member 22,solute carrier family 25 member 22                 | solute carrier family 25 member 22                                                                | Cytoplasm       | transporter             |
| 153 | SLC3A2   | P08195 | 4F2,4F2HC,4T2HC,AI314110,CD98,CD98HC,FRP1,Ly-10,Ly-m10,MDU1,Mgp-2hc,NACAE,solute carrier family 3 (activators of dibasic and neutral amino acid transport), member 2,solute carrier family 3 member 2                             | solute carrier family 3 member 2                                                                  | Plasma Membrane | transporter             |
| 154 | SMAD3    | H0YMP2 | AU022421,DKFZP586N0721,hMAD-3,HSPC193,HsT17436,JV15-2,LDS1C,LDS3,MAD3,MADH3,SMAD family member 3                                                                                                                                  | SMAD family member 3                                                                              | Nucleus         | transcription regulator |
| 155 | SMARCA4  | P51532 | b2b508.1Clo,b2b692Clo,BAF190,BAF190A,BRG,BRG1,CSS4,HP1-BP72,hSNF2b,MRD16,RTPS2,SNF2,SNF2-beta,SNF2-β,SNF2L4,SNF2LB,SW1/SNF,SWI/SNF related, matrix associated, actin dependent regulator of chromatin, subfamily a, member 4,SWI2 | SWI/SNF related, matrix associated, actin dependent regulator of chromatin, subfamily a, member 4 | Nucleus         | transcription regulator |

|     |         |        |                                                                                                                                                                                                                                 |                                                                          |                 |        |
|-----|---------|--------|---------------------------------------------------------------------------------------------------------------------------------------------------------------------------------------------------------------------------------|--------------------------------------------------------------------------|-----------------|--------|
| 156 | SMCHD1  | A6NHR9 | 4931400A14Rik,AW554188,BAMS,ENS MUSG00000041913,FSHD2,mKIAA0650,MommeD1,RGD1307234,SMC hinge domain containing 1,structural maintenance of chromosomes flexible hinge domain containing 1                                       | structural maintenance of chromosomes flexible hinge domain containing 1 | Nucleus         | enzyme |
| 157 | SNRNP70 | P08621 | 2700022N21Rik,3200002N22Rik,AI325098,R74807,RNPU1Z,Rnu1p70,Rnulp70,RPU1,small nuclear ribonucleoprotein 70 (U1),small nuclear ribonucleoprotein U1 subunit 70,Snp1,SNRP70,Srnp70,U1 SNRNP70K,U1 SNRNP70,U1-70,U1-70K,U1AP,U1RNP | small nuclear ribonucleoprotein U1 subunit 70                            | Nucleus         | other  |
| 158 | SNRPA   | M0R268 | C430021M15RIK,Mud1,Rnu1a-1,small nuclear ribonucleoprotein polypeptide A,U1 SNRNP-SPECIFIC protein A,U1-A                                                                                                                       | small nuclear ribonucleoprotein polypeptide A                            | Nucleus         | other  |
| 159 | SNRPD1  | J3QLI9 | AA407109,AL023031,HsT2456,small nuclear ribonucleoprotein D1,small nuclear ribonucleoprotein D1 polypeptide,SMD1,Smn,snRNP D1,SNRPD                                                                                             | small nuclear ribonucleoprotein D1 polypeptide                           | Nucleus         | other  |
| 160 | SON     | P18583 | 2900011L12Rik,AA409051,AU067731,BASS1,C21orf50,C81487,DBP-5,DNA-5B,mKIAA1019,NREBP,SON DNA binding protein,SON3,TOKIMS                                                                                                          | SON DNA binding protein                                                  | Nucleus         | other  |
| 161 | SPOUT1  | Q5T280 | 9930028P05,AL033358,C9orf114,CENP-32,D2Wsu81e,HSPC109,SPOUT domain containing methyltransferase 1                                                                                                                               | SPOUT domain containing methyltransferase 1                              | Nucleus         | other  |
| 162 | SPTAN1  | Q13813 | (alpha)II-SPECTRIN,(α)II-SPECTRIN,2610027H02Rik,A2a,Alpha fodrin,Alpha spectrin,alpha SPECTRIN 2,Alpha-spectorin,Alphall spectrin,EIEE5,Fodrin,IPF,NEAS,Spectri                                                                 | spectrin alpha, non-erythrocytic 1                                       | Plasma Membrane | other  |



|     |        |        |                                                                                                                                                                                                                                                                                                                     |                                                             |                 |       |
|-----|--------|--------|---------------------------------------------------------------------------------------------------------------------------------------------------------------------------------------------------------------------------------------------------------------------------------------------------------------------|-------------------------------------------------------------|-----------------|-------|
|     |        |        | n alpha 2,spectrin alpha, non-erythrocytic 1,Spectrin alpha 2,spectrin alpha, non-erythrocytic 1,spectrin, alpha, non-erythrocytic 1,spectrin, alpha, non-erythrocytic 1,SPNA2,SPTA2,alpha fodrin,alpha spectrin,alpha SPECTRIN 2,alpha-spectorin                                                                   |                                                             |                 |       |
| 163 | SPTBN1 | B2ZZ89 | 9930031C03Rik,AL033301,beta II SPECTRIN,beta-Fodrin,betaSpII,ELF,elf 1,ELF3,HEL102,mKIAA4049,spectrin beta, non-erythrocytic 1,SPECTRIN beta1,Spectrin Beta2,spectrin beta, non-erythrocytic 1,spectrin, beta, non-erythrocytic 1,spectrin, beta, non-erythrocytic 1,Spnb1,SPNB2,SPTB2,beta II SPECTRIN,beta-Fodrin | spectrin beta, non-erythrocytic 1                           | Plasma Membrane | other |
| 164 | SREK1  | B3KRJ9 | 8430401B01,AI450757,AI462342,AL118220,SFRS12,splicing regulatory glutamic acid and lysine rich protein 1,splicing regulatory glutamine/lysine-rich protein 1,SRp508,SRp86,Srsf12                                                                                                                                    | splicing regulatory glutamic acid and lysine rich protein 1 | Nucleus         | other |
| 165 | SRRM2  | Q9UQ35 | 5033413A03Rik,AA410130,Cwc21,CWF21,HSPC075,KIAA0324,mKIAA0324,serine/arginine repetitive matrix 2,SRL300,SRm300                                                                                                                                                                                                     | serine/arginine repetitive matrix 2                         | Nucleus         | other |
| 166 | SRRT   | Q9BXP5 | 2810019G02RIK,ARS2,ASR2,ASR2A,ASR2B,ASR2C,ASR2D,serrate,serrate RNA effector molecule homolog (Arabidopsis),serrate, RNA effector molecule                                                                                                                                                                          | serrate, RNA effector molecule                              | Nucleus         | other |
| 167 | SRSF10 | O75494 | FUSIP1,FUSIP2,LOC100505793,LOC100996657,LOC642558,LOC727922,NSSR,NSSR1,NSSR2,PPP1R149,serine and arginine rich splicing factor 10,serine/arginine-rich splicing factor 10,SFRS13,SFRS13A,SRp38,SRp40,Srsf13a,TASR,TASR1,TASR2,TLS-associated serine-arginine                                                        | serine and arginine rich splicing factor 10                 | Nucleus         | other |
| 168 | SRSF5  | Q13243 | HRS,serine and arginine rich splicing factor 5,SFRS5,SRP40                                                                                                                                                                                                                                                          | serine and arginine rich splicing                           | Nucleus         | other |

|     |        |        |                                                                                                                             |                                                |                 |                         |
|-----|--------|--------|-----------------------------------------------------------------------------------------------------------------------------|------------------------------------------------|-----------------|-------------------------|
|     |        |        |                                                                                                                             | factor 5                                       |                 |                         |
| 169 | SRSF7  | Q16629 | 9430065L19Rik,9G8,AAG3,NX-96,serine and arginine rich splicing factor 7,serine/arginine-rich splicing factor 7,SFRS7        | serine and arginine rich splicing factor 7     | Nucleus         | other                   |
| 170 | SUPT6H | Q7KZ85 | 5131400N11RIK,AI132449,emb-5,mKlAA0162,SPT6,SPT6 homolog, histone chaperone,SPT6H,SPTH6, suppressor of Ty 6,Supt6           | SPT6 homolog, histone chaperone                | Nucleus         | transcription regulator |
| 171 | TBL2   | B4DY59 | C76179,transducin (beta)-like 2,transducin (β)-like 2,transducin beta like 2,transducin β like 2,WBSCR13,WS-betaTRP,WS-bTRP | transducin beta like 2                         | Plasma Membrane | other                   |
| 172 | TBL3   | A0JLS5 | 9430070M15Rik,SAZD,transducin (beta)-like 3,transducin (β)-like 3,transducin beta like 3,transducin β like 3,UTP13          | transducin beta like 3                         | Cytoplasm       | peptidase               |
| 173 | TEFM   | Q96QE5 | 1110002N22Rik,C17orf42,RGD1306595,transcription elongation factor, mitochondrial                                            | transcription elongation factor, mitochondrial | Cytoplasm       | transcription regulator |
| 174 | TFB2M  | Q9H5Q4 | Hkp1,mtTFB2,transcription factor B2, mitochondrial                                                                          | transcription factor B2, mitochondrial         | Cytoplasm       | enzyme                  |
| 175 | THAP11 | Q96EK4 | 2810036E22RIK,AB041579,CTG-B43a,CTG-B45d,HRIHFB2206,RONIN,THAP domain containing 11                                         | THAP domain containing 11                      | Nucleus         | transcription regulator |
| 176 | THOC2  | Q8NI27 | 6330441O12RIK,CXorf3,D130005M13,D130005M13Rik,dJ506G2.1,Gm1139,Gm1793,hTREX120,MRX12,MRX35,RGD1561623,THO complex 2,THO2    | THO complex 2                                  | Nucleus         | other                   |
| 177 | TJP1   | Q07157 | Gm1693,tight junction protein 1,ZO-1,zona occludens 1                                                                       | tight junction protein 1                       | Plasma Membrane | other                   |
| 178 | TJP2   | Q9UDY2 | C9DUPq21.11,DFNA51,DUP9q21.11,P FIC4,tight junction protein 2,X104,ZO-2                                                     | tight junction protein 2                       | Plasma Membrane | kinase                  |

|     |       |        |                                                                                                                                                                                                                                                                           |                                             |           |                         |
|-----|-------|--------|---------------------------------------------------------------------------------------------------------------------------------------------------------------------------------------------------------------------------------------------------------------------------|---------------------------------------------|-----------|-------------------------|
| 179 | TMA16 | D6RA57 | 1810029B16Rik,C4orf43,Hypothetical protein<br>FLJ11184,RGD1305222,translation machinery associated 16,translation machinery associated 16 homolog                                                                                                                         | translation machinery associated 16 homolog | Nucleus   | other                   |
| 180 | TMPO  | P42166 | 5630400D24Rik,AI195756,AI606875,AW214352,AW547477,CMD1T,LAP2,Lap2 alpha,Lap2 alpha,LEMD4,PRO0868,thymopoietin,TP,TP alpha,TP beta/gamma,TP alpha,TP beta/gamma                                                                                                            | thymopoietin                                | Nucleus   | other                   |
| 181 | TOE1  | B4DP23 | 4930584N22RIK,4933424D16Rik,AI413517,CAF1Z,hCaf1z,PCH7,target of EGR1, exonuclease,target of EGR1, member 1 (nuclear)                                                                                                                                                     | target of EGR1, exonuclease                 | Nucleus   | enzyme                  |
| 182 | TOP2A | P11388 | DNA TOPOISOMERASE II alpha,DNA TOPOISOMERASE II alpha,Top2a: topoisomerase (dna) ii alpha (170kd),TOPO2 alpha,TOPO2 alpha,topoisomerase (DNA) II alpha,topoisomerase (DNA) II alpha,Topoisomerase II alpha,Topoisomerase II alpha,TP2A                                    | DNA topoisomerase II alpha                  | Nucleus   | enzyme                  |
| 183 | TOP2B | E9PCY5 | D230016L12RIK,DNA topoisomerase II beta,DNA topoisomerase II beta,Top-2,top2beta,TOPIIB,Topo2 beta,topoisomerase (DNA) II beta,topoisomerase (DNA) II beta,Topoisomerase ii beta                                                                                          | DNA topoisomerase II beta                   | Nucleus   | enzyme                  |
| 184 | TP53  | P04637 | bb1,BCC7,bfy,bhy,LFS1,p44,P53,P53 cellular tumour antigen,p53 tumor suppressor,transformation related protein 53,TRP53,tumor protein p53,tumour protein p53                                                                                                               | tumor protein p53                           | Nucleus   | transcription regulator |
| 185 | TPM3  | B2RDE1 | CAPM1,CFTD,gamma-TM,HEL-189,HEL-S-82p,hscp30,hTM30nm,hTMnm,LOC286890,NEM1,OK/SW-cl.5,TM-5,TM3,TM30,TM30nm,Tm5NM,Tm5nm1-2,TMnm,Tpm-5,TPM3nu,TPMsk3,TRK,Trop-5,tropomyosin 3,tropomyosin 3,gamma,tropomyosin 3, gamma,tropomyosin gamma,Tropomyosin gamma,Tropomyosin gamma | tropomyosin 3                               | Cytoplasm | other                   |
| 186 | TPM4  | K7ERG3 | 2610528G24RIK,HEL-S-108,Tpm4.2,Tpm4.2cy,tropomyosin 4                                                                                                                                                                                                                     | tropomyosin 4                               | Cytoplasm | other                   |

|     |        |        |                                                                                                                                                      |                                                      |           |                         |
|-----|--------|--------|------------------------------------------------------------------------------------------------------------------------------------------------------|------------------------------------------------------|-----------|-------------------------|
| 187 | TPR    | P12270 | 2610029M07Rik,C77892,FLJ13049,translocated promoter region, nuclear basket protein                                                                   | translocated promoter region, nuclear basket protein | Nucleus   | other                   |
| 188 | TRAM1  | G3XAN4 | 1810049E02Rik,LOC100130862,PNAS8,TRAM,TRAMP,translocating chain-associating membrane protein 1,translocation associated membrane protein 1           | translocation associated membrane protein 1          | Cytoplasm | other                   |
| 189 | TRIP12 | Q14669 | 1110036I07RIK,6720416K24RIK,AA410158,GTL6,KIAA0045,MRD49,thyroid hormone receptor interactor 12,ULF                                                  | thyroid hormone receptor interactor 12               | Cytoplasm | enzyme                  |
| 190 | TTBK2  | Q8IWY7 | 2610507N02RIK,AI326283,B930008N24Rik,KIAA0847,mKIAA0847,SCA11,tau tubulin kinase 2,TTBK,Ttbk1,TTK                                                    | tau tubulin kinase 2                                 | Cytoplasm | kinase                  |
| 191 | TUFM   | P49411 | 2300002G02RIK,C76308,C76389,COXD4,EF-TuMT,EFTU,MTEF-TU,P43,Tu translation elongation factor, mitochondrial                                           | Tu translation elongation factor, mitochondrial      | Cytoplasm | translation regulator   |
| 192 | U2SURP | O15042 | 2610101N10Rik,AU023006,fsAPa,RGD1307882,SR140,U2 snRNP-associated SURP domain containing                                                             | U2 snRNP associated SURP domain containing           | Nucleus   | other                   |
| 193 | UBB    | J3QS39 | AL033289,HEL-S-50,RPS27A,UBA52,Ub2,UBC,UBIQUITIN,UBIQUITIN B                                                                                         | ubiquitin B                                          | Cytoplasm | enzyme                  |
| 194 | UBTF   | B4DNQ1 | A930005G04RIK,CONDBA,LOC679205,NOR-90,TCFUBF,UBF,UBF-1,upstream binding transcription factor,upstream binding transcription factor, RNA polymerase I | upstream binding transcription factor                | Nucleus   | transcription regulator |
| 195 | UQCRC2 | H3BSJ9 | 1500004O06Rik,AURA11,Core 2,CORE protein 2 of COMPLEX III,Cytochrome b-c1 complex subunit 2,MC3DN5,MGC94368,Mitochondrial                            | ubiquinol-cytochrome c reductase                     | Cytoplasm | enzyme                  |

|     |        |        |                                                                                                                                                                                                      |                                                       |           |                                    |
|-----|--------|--------|------------------------------------------------------------------------------------------------------------------------------------------------------------------------------------------------------|-------------------------------------------------------|-----------|------------------------------------|
|     |        |        | Core Protein2,QCR2,Rikubiquinol<br>Cytochrome C Reductase Core Protein<br>2,Ubiquinol Cytochrome C Reductase<br>Core Protein 2<br>Precursor,ubiquinol-cytochrome c<br>reductase core protein 2,UQCR2 | core<br>protein 2                                     |           |                                    |
| 196 | UTP20  | O75691 | 1A6/DRIM,3830408P06Rik,AA617408,<br>DRIM,mDRIM,mDRIN,RGD1560606,UT<br>P20 small subunit processome<br>component,UTP20, small subunit<br>processome component                                         | UTP20,<br>small<br>subunit<br>processome<br>component | Nucleus   | other                              |
| 197 | UTP25  | A8K0P8 | AA408296,AW045375,C1orf107,DEF,D<br>IEXF,digestive organ expansion factor<br>homolog<br>(zebrafish),DJ434O14.5,UTP25, small<br>subunit processor component                                           | UTP25,<br>small<br>subunit<br>processor<br>component  | Nucleus   | other                              |
| 198 | VCP    | P55072 | 3110001E05,CDC48,IBMPFD,p97,p97/<br>VCP,Ter atpase,TERA,Transitional<br>Endoplasmic Reticulum<br>Atpase,valosin-containing<br>protein,XSG7                                                           | valosin<br>containing<br>protein                      | Cytoplasm | enzyme                             |
| 199 | VDAC2  | P45880 | mVDAC2,mVDAC6,POR,Vdac6,voltage-<br>dependent anion channel 2                                                                                                                                        | voltage<br>dependen<br>t anion<br>channel 2           | Cytoplasm | ion<br>channe<br>l                 |
| 200 | WDR11  | Q659C9 | 2900055P10Rik,AW489876,BRWD2,D<br>R11,HH14,mKIAA1351,SRI1,WD repeat<br>domain 11,WDR15                                                                                                               | WD<br>repeat<br>domain 11                             | Cytoplasm | other                              |
| 201 | WDR3   | Q5TDG3 | AW546279,D030020G18Rik,DIP2,UTP<br>12,WD repeat domain 3                                                                                                                                             | WD<br>repeat<br>domain 3                              | Cytoplasm | other                              |
| 202 | YBX1   | Q6PKI6 | 1700102N10RIK,BP-8,Byb1,C79409,CB<br>F-A,CSDA2,CSDB,DBPB,DBPB-LIKE,EF1<br>A,EFI-A,MDR-NF1,MSY1,mYB-1a,NSEP<br>-1,THYROID Y BOX,VACSSBF1,Y box<br>protein 1,Y-box Binding<br>Protein1,YB-1,YEBP       | Y-box<br>binding<br>protein 1                         | Nucleus   | transcr<br>iption<br>regulat<br>or |
| 203 | YTHDC2 | Q6ZMY0 | 3010002F02RIK,BC037178,CAHL,hYTH<br>DC2,LOC100365272,mYTHDC2,RGD15<br>63192,YTH domain containing 2                                                                                                  | YTH<br>domain<br>containing<br>2                      | Cytoplasm | enzym<br>e                         |

|     |        |        |                                                                                                                                                                                                                                                                                                                                                                                                                                                                                                                                                                                                                                                                                                                                                                                                                                                                                                                                                                                                   |                                                                             |           |                         |
|-----|--------|--------|---------------------------------------------------------------------------------------------------------------------------------------------------------------------------------------------------------------------------------------------------------------------------------------------------------------------------------------------------------------------------------------------------------------------------------------------------------------------------------------------------------------------------------------------------------------------------------------------------------------------------------------------------------------------------------------------------------------------------------------------------------------------------------------------------------------------------------------------------------------------------------------------------------------------------------------------------------------------------------------------------|-----------------------------------------------------------------------------|-----------|-------------------------|
| 204 | YWHAZ  | D0PNI1 | 1110013I11RIK,14-3-3 delta,14-3-3 ZETA/delta,14-3-3 $\delta$ ,14-3-3 $\zeta/\delta$ ,14-3-3-zeta,14-3-3- $\zeta$ ,14-3-3z,AI596267,AL022924,AU020854,HEL-S-3,HEL-S-93,HEL4,KCIP-1,Protein kinase c inhibitor 1 beta/alpha,Protein kinase c inhibitor 1 $\beta/\alpha$ ,Protein kinase C inhibitor protein 1 zeta/delta,Protein kinase C inhibitor protein 1 $\zeta/\delta$ ,Tyro mono,Tyrosine 3-Monooxygenase $\zeta$ Polypeptide,tyrosine<br>3-monooxygenase/tryptophan<br>5-monooxygenase activation protein zeta,tyrosine<br>3-monooxygenase/tryptophan<br>5-monooxygenase activation protein $\zeta$ ,tyrosine<br>3-monooxygenase/tryptophan<br>5-monooxygenase activation protein, zeta,tyrosine<br>3-monooxygenase/tryptophan<br>5-monooxygenase activation protein, zeta polypeptide,tyrosine<br>3-monooxygenase/tryptophan<br>5-monooxygenase activation protein, $\zeta$ ,tyrosine<br>3-monooxygenase/tryptophan<br>5-monooxygenase activation protein, $\zeta$ polypeptide,YMHAZ,YWHAD | tyrosine 3-monooxygenase/tryptophan 5-monooxygenase activation protein zeta | Cytoplasm | enzyme                  |
| 205 | YY1    | H0YJV7 | AW488674,DELTA,GADEVS,Histone alpha factor,Histone $\alpha$ factor,INO80S,NF-E1,NMP-1,UCRBP,Yin and yang 1,YIN-YANG-1,YING-YANG-1,YY1 transcription factor, $\delta$                                                                                                                                                                                                                                                                                                                                                                                                                                                                                                                                                                                                                                                                                                                                                                                                                              | YY1 transcription factor                                                    | Nucleus   | transcription regulator |
| 206 | ZC3H18 | B4DZ24 | 1190001B23Rik,5830416A07Rik,NHN1 ,zinc finger CCCH-type containing 18                                                                                                                                                                                                                                                                                                                                                                                                                                                                                                                                                                                                                                                                                                                                                                                                                                                                                                                             | zinc finger CCCH-type containing 18                                         | Nucleus   | other                   |
| 207 | ZCCHC8 | A8K559 | 5730565F05Rik,LOC100507874,zinc finger CCHC-type containing 8,zinc finger, CCHC domain containing 8                                                                                                                                                                                                                                                                                                                                                                                                                                                                                                                                                                                                                                                                                                                                                                                                                                                                                               | zinc finger CCHC-type containing 8                                          | Nucleus   | other                   |
